# Supplementary material
Source: Research Square preprint supplement (doi:10.21203/rs.3.rs-9576879/v1)
Supplement: Supplementary file 1 [file 542ea5192bcf6bc3209efae8.docx]

**Additional File 4: Detailed characteristics of trials, findings of other outcomes of interest, and characteristics of interventions**

Table of Contents

[Appendix 4: Detailed characteristics of trials assessing loneliness or/and perceived social support grouped by mental health condition 2](#_Toc228388078)

[Table 1. Characteristics of trials assessing loneliness or/and perceived social support as an outcome of interest among people with depression (*n*=10) 2](#_Toc228388079)

[Table 2. Characteristics of trials assessing loneliness or/and perceived social support as an outcome of interest among people with postnatal depression (*n*=6) 18](#_Toc228388080)

[Table 3. Characteristics of trials assessing loneliness or/and perceived social support as an outcome of interest among people with common mental health conditions (depression and anxiety) (*n*=5) 29](#_Toc228388081)

[Table 4. Characteristics of trials assessing loneliness or/and perceived social support as an outcome of interest among people with social anxiety disorder (*n*=2) 37](#_Toc228388082)

[Table 5. Characteristics of trials assessing loneliness or/and perceived social support as an outcome of interest among people with psychosis (*n*=4) 42](#_Toc228388083)

[Table 6. Characteristics of trials assessing loneliness or/and perceived social support as an outcome of interest among people with PTSD (*n*=4) 49](#_Toc228388084)

[Table 7. Characteristics of trials assessing loneliness or/and perceived social support as an outcome of interest in samples with mixed mental health conditions (*n*=8) 55](#_Toc228388085)

[Appendix 5: Findings on other outcomes of interest 72](#_Toc228388086)

[Appendix 6: Characteristics of interventions 85](#_Toc228388087)

# **Appendix 4: Detailed characteristics of trials assessing loneliness or/and perceived social support grouped by mental health condition**

## Table 1. Characteristics of trials assessing loneliness or/and perceived social support as an outcome of interest among people with depression (*n*=10)

| Author  Study setting  Type of sample | Sample characteristics (Age, gender, ethnicity) | Intervention type/ categorisation | Intervention name, number of sessions and total duration | Comparator group | Follow up period(s) for data  collection | Loneliness/perceived social support measure | Confounders adjusted for | Descriptive and summary statistics (e.g. Mean (M), Standard Deviation (SD), t test) | Summary of findings: Effectiveness of the intervention | Quality assessment rating |
| --- | --- | --- | --- | --- | --- | --- | --- | --- | --- | --- |
| **Loneliness** | | | | | | | | | | |
| **Individual-based intervention** | | | | | | | | | | |
| Soucy et al., 2019**  Participants recruited via newspaper, radio, interventions, university distribution list, and posters  Quebec, Canada | 59 adults aged between 18-65 with mild to moderate depressive symptoms based on the Mini International Neuropsychiatric Interview and Patient Health Questionnaire (PHQ)  Females: 73%  Mean age: 32.49 years  Age range: 20-62 | Two interventions:  Behavioural activation (BA)  Physical activity (PA) | Self-directed manualised BA or PA programme  Study author contacted participants every two weeks to help participants follow set goals  Duration: 8 weeks | Wait-list control group | End of treatment  (8 weeks) | 20-item Laval University Loneliness Scale (French version of the UCLA Loneliness scale) | N/A | Baseline loneliness:  BA group (n=20):  Mean= 48.09 (*SD*=2.92)  PA group (n=19):  Mean= 48.87 (*SD*=3.08)  Control group (n=20):  Mean= 49.35 (*SD*=2.92)  Post-intervention:  BA group (n=20):  Mean= 42.12 (*SD*=3.38)  PA group (n=19):  Mean= 45.44 (*SD*=3.36)  Control group (n=20):  Mean= 45.17 (*SD*=3.02) | There were no significant differences between groups or group by time interaction between interventions and the control group (*F* (4, 71.27) = 0.181, *p* = .947) at end of treatment | High concerns |
| Van Orden et al., 2021**  Primary care clinics and an outpatient geriatric psychiatry clinic  USA | 62 adults aged 60 years and above who reported feeling lonely or like a burden and at risk of suicide  63% had mild to severe symptoms of depression based on the Quick Inventory of Depressive Symptomatology  Mild depression:  21 (34%)  Moderate depression: 14 (23%)  Severe depression: 4 (6%)  Mean age: 72 years (SD= 9.07)  Females: 42 (68%)  Ethnicity: White: 57 (91.9%)  Black: 3 (4.8%)  Native American: 1 (1.6%),  1 refused to answer (1.6%) | Psychotherapeutic social engagement intervention | Social Engage (S-ENG)  Up to 10 in-home individual sessions  Duration: approximately 10 weeks | Care-as-usual (CAU) | Follow-up at 3-weeks, 6-weeks, and 10-weeks post-baseline | Thwarted belongingness subscale from the Interpersonal Needs Questionnaire (INQ) | Ongoing mental health treatment and personality traits (neuroticism and conscientiousness) | Baseline thwarted belongingness:  Control group:  Mean= 5.97 (*SD*=4.11)  Intervention group:  Mean= 6.47 (*SD*=3.69)  Mean differences (S-ENG vs. CAU)  3 weeks:  Mean difference= 0.82 (*SE* = 0.75), *z* = 1.09, *p* =.276  6 weeks:  Mean difference= − 0.49 (*SE* = 0.75), *z* = − 0.65, *p* =.514  10 weeks:  Mean difference= − 0.79 (*SE* = 0.72), *z* = −1.09, *p* =.278 | No significant differences in belongingness between the intervention and control groups were observed at any timepoint (group by time interaction: χ2(3) = 4.91, *p* = .178) | Some concerns |
| **Online/Digital intervention** | | | | | | | | | | |
| Joo et al., 2025**    Community-based aging and social service organisations and a geriatric primary care clinic  Northeast USA | 149 community-dwelling socially disadvantaged older adults screened for depressive symptoms based on the Patient Health Questionnaire (PHQ) (scores ≥ 5)    Age:  Median = 69.5 years  Age range: 51-95  Female: 113 (84.3%)    Ethnicity: Native American: 1 (0.7%)  Asian: 1 (0.7%)  Black: 70 (52.2%)  White: 55 (41%)  Multiracial: 6 (4.5%)  Other: 1 (0.7%) Hispanic: 3 (2.2%) | Peer support social engagement intervention | Peer Enhanced Depression Care (PEERS)  8 weekly, 60-minute telephone meetings    Duration: 8 weeks | Social interaction control group:  8 weekly 45-minute social telephone calls were provided by trained non-peers | Assessment at post-intervention (8 weeks), and follow-ups at 3, 6, 9 and 12 months from baseline | 20-item Revised-UCLA Loneliness Scale | Adjustment for confounding covariates (e.g. sex, age– full list not provided) | Raw change in loneliness post-intervention  Control group:  Mean= -3.35 (*SD*=14.19)    Intervention group:  Mean= -6.91 (*SD*=10.82)  3-month follow-up:  Control group:  Mean= -6.72 (*SD*=14.03)    Intervention group:  Mean= -9.07 (*SD*=12.33)    6-month follow-up:  Control group:  Mean= -5.81 (*SD*=12.39)    Intervention group:  Mean= -8.91 (*SD*=12.63)    9-month follow-up:  Control group:  Mean= -7 (*SD*=12.36)    Intervention group:  Mean= -9.44 (*SD*=15.21)    12-month follow-up:  Control group:  Mean= -6.17 (*SD*=11.42)    Intervention group:  Mean= -10.37 (*SD*=13.04) | There were no significant differences in loneliness between the intervention and control group up until 12-month follow-up (statistics not reported) | Some concerns |
| Kahlon et al., 2023**  Participants recruited through the local Meals on Wheels service, a programme addressing hunger and isolation for people who are homebound  USA | Post-hoc analysis of a prior RCT with 240 participants  58 adults with symptoms of depression based on the Patient Health Questionnaire (scores >10)  Mean age: 63 years (SD=11)  Females: 80%  Ethnicity: N/A | Supported socialisation programme | Layperson-Delivered Telephone Program  One call per weekday for first week with option to reduce to two or three for weeks 2-4  Duration: 4 weeks | Control group received assessment calls at baseline and 4 weeks | End of treatment  (4 weeks) | 3-item UCLA Loneliness Scale (UCLA)  6-item De Jong Gierveld Loneliness Scale | Controlled for clustering by caller | **UCLA**  Baseline  Control group:  Mean= 8.07 (*SE*=0.31), 95% CI [4.73, 8.70]  Intervention group:  Mean= 8.19 (*SE*=0.24), 95% CI [7.68, 8.69]  Post-intervention  Control group:  Mean= 8.03 (*SE*=0.31), 95% CI [7.41, 8.66]  Intervention group:  Mean= 6.65 (*SE*=0.34), 95% CI [5.95, 7.36]  Mean difference= 1.5, 95% CI [1.1, 1.9], *p* <.001  **De Jong Gierveld**  Baseline  Control group:  Mean= 4.40 (*SE*=0.26), 95% CI [3.87, 4.93]  Intervention group:  Mean= 3.70 (*SE*=0.38) 95% CI [2.92, 4.49]  Post-intervention  Control group:  Mean= 4.50 (*SE*=0.24), 95% CI [4.00, 5.00]  Intervention group: Mean= 3.12 (*SE*=0.36), 95% CI [2.37, 3.86]  Mean difference= 0.6, 95% CI [0.3, 1.0], *p* =.02 | There was significant group by time interactions for both the UCLA and De Jong Gierveld loneliness scales, indicating that loneliness improved significantly more in the intervention than in the control group after 4 weeks (UCLA: time by group interaction: *d* = 0.81, *p* <.001; De Jong: time by group interaction: *d* = 0.87, *p* = .02)  There was significant reduction in loneliness in the intervention group compared to the control group | High concerns |
| **Perceived social support** | | | | | | | | | | |
| **Group-based intervention** | | | | | | | | | | |
| Conley et al., 2024 **    Participants recruited through campus counselling centre, psychology participant pool, or flyers across campus  Mid-sized, Midwestern university in the USA | 18 adult undergraduate college students with mild to moderate depression based on the Patient Health Questionnaire (scoring 5 to 19)    Intervention group:  Mean age:  19.90 years  Females: 7 (77.8%)    Ethnicity: African American or Black: 2 (22.2%)  Asian: 3 (33.3%)  Non-Hispanic Caucasian/White: 1 (11.1%)  Bi/multi-racial: 1 (11.1%)  Middle Eastern or Hispanic White: 2 (22.2%)  Missing: 0 (0%)    Control group:  Mean age:  19.47 years      Females: 8 (88.9%)    Ethnicity: African American or Black: 0 (0%)  Asian: 1 (11.1%)  Non-Hispanic Caucasian/White: 3 (33.3%)  Bi/multi-racial: 3 (33.3%)  Middle Eastern or Hispanic White: 1 (11.1%)  Missing: 1 (11.1%) | Interpersonal psychotherapy | An adaptation of interpersonal psychotherapy tailored toward emerging adult college students with mild to moderate depression  One 45–60 minute pre-group individual session and 8 weekly 90-minute group sessions    Duration: 11 weeks | Referral to usual care | End of treatment (Week 11 (inferred) | The 23-item Social Support Appraisals (SSA) Scale | N/A | Baseline:  Control group:  Mean = 2.87 (*SD*=0.45)    Intervention group:  Mean = 2.68 (*SD*=0.37)    Post intervention:  Control group:  Mean = 2.86 (*SD*=0.53)    Intervention group:  Mean = 2.96 (*SD*=0.45) | There was a significant group by time interaction post-intervention indicating that the intervention group reported greater improvements in social support compared to the control group over time (*F* (1, 15) = 4.67, *p* = .047, η²ₚ = .24) | High concerns |
| Leung & Li, 2024**  Participants were recruited from non-government organisations, local churches, tertiary institutions and district councils  Hong Kong | 57 participants with mild or moderate depressive symptoms based on the Patient Health Questionnaire (score 5 to 12 out of 27)  Mean age: N/A  71.9% were aged 46-64  Ethnicity: N/A  Females: 75.4% | Spiritual connectivity intervention | Spiritual Connectivity Intervention  8 weekly sessions  Duration: 8 weeks | Waitlist control group | End of treatment  (8 weeks)  Follow-up at 3-month and week 20 | 12-item Multidimensional Scale of Perceived Social Support (MSPSS) (validated, Chinese versions of the scales) | Age, gender  education, marital status,  religious affiliation,  employment status,  past psychiatrist treatment history  Baseline values of each outcome variable were included as covariates’ | Baseline social support:  Control group:  Mean= 48.86 (*SD*=13.67)  Intervention group:  Mean= 51.82 (*SD*=14.36)  Post-intervention:  Control group:  Mean= 53.34 (*SD*=10.04)  Intervention group:  Mean= 58.68 (*SD*= 12.82)  Mean difference= 5.646, 95% CI [-0.385, 11.678], *d*=0.51, not significant | The between-group difference in MSPSS scores was not significant at 8 weeks (*d* = 0.51) | Some concerns |
| **Individual-based intervention** | | | | | | | | | | |
| Ayar & Sabanciogullari, 2022 **  Inner city center, inpatient public hospital  Turkey | 57 adults diagnosed with depressive disorder based on Beck Depression Inventory (scores between 30-45)  Intervention group:  Mean age: 38.68 years (SD = 9.98)  Females: 16 (57.1%)  Ethnicity: N/A  Control group:  Mean age: 40.34 years (SD = 13.53)  Females: 11 (37.9%)  Ethnicity: N/A | Solution-Oriented Therapy Programme concentrating on the solutions for clarifying problems | Solution-Oriented Therapy  One preliminary interview and between 5 to 10, 40-minute solution-oriented sessions  Duration: 20 days | Treatment as usual (Routine inpatient nursing care) | End of intervention (1 week post a 20-day intervention)  Follow up at 12 weeks | 12-item Perceived Social Support Inventory (PSSI) | N/A | Baseline:  Control group:  Mean= 48.93 (*SD*=9.50)  Intervention group:  Mean= 45.36 (*SD*=8.74)  After 1 week:  Control group:  Mean= 49.69 (*SD*=10.89)  Intervention group:  Mean= 50.79 (*SD*=10.81)  After 12 weeks  Control group:  Mean= 46.59 (*SD*=9.75)  Intervention group:  Mean= 46.61 (*SD*=10.37) | There were no statistically significant differences in the mean PSSI scores between the intervention and control group at post-treatment, (*t* = − 0.38, *p* = .705) and at 3-month follow-up (*t* = − 0.02, *p* = .994) | High concerns |
| **Online/Digital intervention** | | | | | | | | | | |
| Moeini et al., 2019**  Female students recruited from schools  Western Iran | 128 female students with mild-to-moderate depressive symptoms based on the Epidemiologic Studies Depression Scale (scores between 10-45)  Mean age: 16.7 years (SD 1.86)  Ethnicity: N/A  Females: 128 (100%) | Web-based depression improvement program based on CBT principles | Dorehye Amozeshie Dokhtaran (DAD Program)  Eight 30-min sessions  Duration: 12 weeks | N/A | End of treatment (3 months)  Follow-up at 24 weeks post-baseline | Farsi version of the Perceived Social Support Scale-Revised (PSSS-R) | N/A | Baseline:  Intervention group:  Mean= 2.67 (*SD*=0.95)  Control group:  Mean=2.17 (*SD*=0.87)  After 12 Weeks  Intervention group:  Mean= 2.99 (*SD*=1.04)  Control group:  Mean= 2.19 (*SD*=0.85)  24 week follow-up:  Control group:  Mean= 2.18 (*SD*=0.88)  Intervention group:  Mean= 2.95 (*SD*=0.88) | There were significant improvements in social support from baseline to 12 weeks in the intervention group compared to the control group (*p*<.05) | High concerns |
| **Perceived social support and loneliness** | | | | | | | | | | |
| **Group-based intervention** | | | | | | | | | | |
| a Felton et al., 2020**    Five minimum and medium security prisons  New England region of the USA | 168 incarcerated individuals meeting criteria for primary diagnosis of major depressive disorder based on the DSM-IV, and reported physical or sexual trauma    Mean age: 39.61 years (SD = 10.45)    Females: 55  (32.7%)    Ethnicity:  White: 104 (61.9%)  Black/African American: 39 (23.2%)  Other: 25 (14.9%) | Interpersonal psychotherapy (IPT) | Manualized IPT    Twenty 90-minute group sessions and three individual sessions    Duration: 10 weeks    One booster individual session four weeks after the final group session    Plus, treatment as usual | Treatment as usual (TAU)    Referrals to existing mental health resources  (medication treatment; limited psychosocial treatments if available) | Post-intervention (12 weeks) | 12-item Multidimensional Scale of Perceived Social Support (MSPSS)    10-item UCLA Loneliness Scale | Sex, age  race/ethnicity | Social support (total sample):    Baseline:    Mean= 51.80  (*SD*=18.34)    Follow-up:  Mean= 54.73 (*SD*=18.05)    Loneliness (total sample):    Baseline:  Mean= 29.92  (*SD*=6.06)    Follow-up:  Mean= 27.77  (*SD*=6.78) | Compared with TAU alone, IPT + TAU did not significantly improve perceived social support (*b*= 2.37, *SE* = 2.50, *p* = .345) or loneliness (*b*= 0.32, *SE* = 0.86, *p* = .708) | Some concerns |
| Johnson et al., 2019**  Men’s and women’s medium security prison facilities  Northeastern USA | 181 participants that met criteria for major depressive disorder using the Structured Clinical Interview (DSM-IV)  Mean age: 39 years (SD = 10.4)  Females: 64 (35%)  Ethnicity:  African American  /Black: 36 (20%)  Asian: 2 (1%)  Native American  /Alaskan Native: 7 (4%)  White: 112 (62%)  Other: 24 (13%) | Group based interpersonal psychotherapy | Interpersonal psychotherapy (IPT)  Twenty 90-minute sessions  Individual sessions to prepare participants  Duration: 10 weeks | Treatment as usual (any other treatment available) | End of treatment (unclear)  Follow-up at 3 months | 12-item Multidimensional Scale of Perceived Social Support Scale  20-item UCLA Loneliness Scale | Diagnosis of ‘borderline personality disorder’, Baseline social support | Baseline: N/A  3 month follow up:  Perceived social support:  Control group:  Mean= 53.94  Intervention group:  Mean= 56.25  Loneliness:  Control group:  Mean= 27.64  Intervention group:  Mean= 26.24 | There was no significant difference in loneliness (*F* (1,179) = 2.24, *p* = .14, *d* = -0.23) or social support (*F* (1,179) = 2.18, *p* = .14, *d* = 0.13) between the intervention and control group at 3-month follow-up | Some concerns |
| Rodriguez-Romero et al., 2021**  Patients from primary healthcare centres  Barcelona | 55 lonely patients aged 65 and above  61.8% of participants had moderate to severe depression based on the Yesavage Depression Scale  Mean age: 80.2 years (SD= 12.8)  Females: 48 (87.3%) | Community based intervention consisting of group-based activities | Community intervention  18 weekly sessions  18 sessions  Duration:  6 months | Treatment as usual | End of treatment  (6 months) | UCLA Loneliness Scale  DUKE-11 Functional Social Support Questionnaire | N/A | Baseline loneliness:  Control group:  Mean= 25.6 (*SD*=4.8)  Intervention group:  Mean= 21.3 (*SD*=6.2)  Post-intervention:  Control group:  Mean= 27.1 (*SD*=9.2)  Intervention group:  Mean= 31.5 (*SD*=8.9)  Mean difference= 8.63, 95% CI: [1.97-15.3], *p* = .012  Baseline social support:  Control group:  Mean= 38.3 (*SD*=10.6)  Intervention group:  Mean= 33.5 (*SD*=9.3)  Post-intervention:  Control group:  Mean= 40.5 (*SD*=11.2)  Intervention group:  Mean= 41.4 (*SD*=6.6)  Mean difference=-5.77, 95% CI [-2.28, 13.82), *p* = .16 | The mean improvement in loneliness was 8.63 (95% CI [1.97,15.30], *p*=.01) points higher in the intervention group compared to the control group post-treatment (6 months)  There was no significant improvement in social support between the intervention and control group | High concerns |

*Subjective social isolation as the primary outcome

**Subjective social isolation as one of the main outcomes or secondary outcome

N/A: Not available

a Felton et al (2019) conducted a secondary analysis of data from a larger RCT included in this review (Johnson et al., 2019)

## Table 2. Characteristics of trials assessing loneliness or/and perceived social support as an outcome of interest among people with postnatal depression (*n*=6)

| Author  Study setting  Type of sample | Sample characteristics (Age, gender, ethnicity) | | Intervention  type/ categorisation | Intervention name, number of sessions and total duration | Comparator group | Follow up period(s) for data collection | Loneliness/perceived social support measure | Confounders adjusted for | Descriptive and summary statistics (e.g Mean (M), Standard Deviation (SD), t test) | | Summary of findings: Effectiveness of the intervention | Quality assessment rating |
| --- | --- | --- | --- | --- | --- | --- | --- | --- | --- | --- | --- | --- |
| **Loneliness** | | | | | | | | | | | | |
| **Online/Digital intervention** | | | | | | | | | | | | |
| Perkins, Spiro & Waddel, 2023*  Participants recruited through community channels (e.g. newsletters)  United Kingdom | 89 women with post-natal depression based on the Edinburgh Post natal Depression Scale (scores ≥10)  Mean age: 35.39 years (SD= 3.74)    Female: 100%    Ethnicity:  White: 67%  Arab: 1%  Asian: 8%  Black: 6%  Mixed: 12%  Other: 5% | | Supportive socialisation intervention to promote social connectedness with other mothers using online song-writing | Songs from Home    Weekly 60 minutes online sessions via Zoom    Duration: 6 weeks | Waitlist control group | End of treatment (6 weeks)  Assessment following each of the 6 sessions, and follow up at 4 weeks after the end of the intervention | 3-item UCLA Loneliness Scale | N/A | Baseline  for loneliness:  Control group:  Mean= 7.30 (*SD*=1.29)  Intervention group:  Mean= 7.53 (*SD*=1.24)  Mean difference= 0.23,  *t*= 0.66, *p* =.51  Week 3:  Control group: Mean= 7.10 (*SD*=1.24)  Intervention group: Mean= 6.28 (*SD*=1.35)  Mean difference=-0.82, *t*= 2.33, *p* = .02.  Week 4:  Control group: Mean= 7 (*SD*=1.49)  Intervention group: Mean= 5.91 (*SD*=1.42)  Mean difference= -1.09, *t* = - 3.12, *p* = .002  Week 6:  Control group: Mean= 6.83 (*SD*=1.46)  Intervention group: Mean= 5.81 (*SD*=1.80)  Mean difference= - 1.02, *t*= -2.91, *p* = .004  Week 10 (follow-up):  Control group: Mean= 6.83 (*SD*=1.32)  Intervention group: Mean= 5.81 (*SD*=1.38)  Mean difference= -1.02, *t =* - 2.91, *p*= .004. | | The intervention group reported significantly lower loneliness than the control group across all time-points (6 weeks and 4-week follow-up) (Main effect: *F* (1,60) = 4.42, *p* < .05, η²ₚ = .069)  Loneliness scores were significantly lower in the intervention group compared to the control group over time (*F* (5.554, 333.248) = 6.50, *p* < .001, η²ₚ = .098) | High concerns |
| **Perceived social support** | | | | | | | | | | | | |
| **Group-based interventions** | | | | | | | | | | | | |
| Boyd et al., 2017 **  Seven paediatric primary care sites (5 hospital-affiliated, 2 community health clinics) and one Early Head Start site, serving people who are economically disadvantaged in two urban neighbourhoods    USA | 61 depressed caregivers of toddlers measured using the Patient Health Questionnaire  Intervention group:  Age:  18-24 years: 10 (35.7%)  25-29 years: 7 (25.0%)  30-42 years: 11 (39.3%)    Females: 31 (96.9%)  Ethnicity: African American or Black: 26 (81.3%)  Other: 6 (18.7%)  Control group:  Age:  18-24 years: 12 (48.0%)  25-29 years: 8 (32.0%)  30-42 years: 5 (20.0%)    Females: 29 (100%)  Ethnicity: African American or Black: 27 (93.1%)  Other: 2 (6.9%) | | Parenting program plus psychoeducation | Adapted Incredible Years Parents, Babies and Toddlers program and depression psychoeducation material  12 weekly sessions  Duration: 12 weeks | Wait-list control | End of treatment  (12 weeks) | 12-item Multidimensional Scale of Perceived Social Support (MSPSS) | Baseline participant demographics (i.e., education, income level, marital status) and Beck Depression Inventory scores (BDI-II) | Baseline social support  Control group:  Mean= 3.91 (*SD*=1.43)  Intervention group:  Mean= 4.59 (*SD*=1.35)  Postintervention social support  Control group:  Mean= 4.15 (*SD*=1.40)  Intervention group:  Mean= 4.90 (*SD*=1.14)  Post-intervention adjusted change score mean difference = 0.3, 95% CI [-0.4, 0.9], not significant | | There were no significant differences in perceived social support scores between the intervention and control group post-treatment (12 weeks) | High concerns |
| **Online/Digital intervention** | | | | | | | | | | | | |
| Dol et al., 2025 **  Participants recruited through social media adverts and study posters at local hospitals and clinics  Nova Scotia, Canada | 150  mothers with post-partum depression    61.8 % and 48.5% met the threshold for depression in the intervention and control group (respectively) based on the Edinburgh Post-natal Depression Scale  Intervention group:  Mean age: 30.7 years (SD = 4.8)  Females: 69 (100%)  Ethnicity: White: 58 (84.1%)  Non-White: 11 (15.9)  Control group:  Mean age: 32.1 years (SD = 4.1)  Females: 70 (100%)  Ethnicity:  White: 67 (95.7%)  Non-White: 3 (4.3%) | | Daily SMS text messaging program providing information on maternal mental health | Essential Coaching for Every Mother  2 messages per day in the first 2 weeks and a daily message for 4 weeks  Duration: 6 weeks | Treatment as usual (no text messages) | End of treatment (6 weeks) | 12-item Multidimensional Scale of Perceived Social Support | Parity Maternal age  Respective baseline outcomes | Baseline social support  Control group primiparous:  Mean= 6.26 (*SD* = 1.07)  Control group multiparous: Mean= 6.01 (*SD* = 1.05)  Intervention group primiparous:  Mean= 6.26 (*SD* = 0.73)  Intervention group multiparous:  Mean= 5.83 (*SD* = 1.37)  6 weeks:  Control group primiparous:  Mean= 6.21 (*SD* = 0.64)  Control group multiparous: Mean= 5.77 (*SD* = 0.92)  Intervention group primiparous:  Mean= 6.15 (*SD* = 0.91)  Intervention group multiparous:  Mean= 5.99 (*SD* = 1.0)  Adjusted mean scores at 6 months post-partum:  Control group:  Mean= 5.82 (*SD*=1.12)  Intervention group:  Mean= 5.82 (*SD*=0.95) | | There were no observed  significant differences between the intervention and control group in perceived social support scores at 6 months follow-up (*F* (1,130) =0.071, *p* =.79, η²=.001) | High concerns |
| Liu et al., 2022**  Women recruited from a hospital  China | 130 women diagnosed with post-partum depression based on the Edinburgh Postnatal Depression Scale and are about to give birth  Mean age: 31.81 years (SD = 5.36)  Females: 130 (100%) | | Mobile health app intervention based on mindfulness and perceived social support theory for women about to give birth | ‘We’ll App’ intervention  Number of sessions: N/A  Duration: 8 weeks | Wait-list control group | End of treatment (8 weeks) | 12-item Multidimensional Perceived Social Support Scale (MSPSS) | N/A | Baseline:  Control group:  Mean= 4.719 (*SD*=0.837)  Intervention group: Mean= 4.810 (*SD*=0.949)  After 8 weeks:  Control group:  Mean= 4.827 (*SD*=0.818)  Intervention group:  Mean= 5.232 (*SD*=0.866) | | There were no differences between groups post-treatment (8 weeks) (*F*(1,128) = 3.074, *p* = .08)  There was a significant group by time interaction indicating that the intervention group had significant improvements in social support over time compared to the control group (*F* (1,128) = 7.749, *p* = .006, η²ₚ  =  = .057) | Some concerns |
| Seo et al., 2022**  Participants were recruited through internet communities  Three regions in South Korea | 73 participants from the general population scoring 9 or higher on the Edinburgh Postpartum Depression Scale  Intervention group:  Mean age: 33.54 years (SD = 3.30)  Control group:  Mean age: 33.36 years (SD = 4.47)  Female: 73 (100%) | | Cognitive behavioural therapy based self-management mobile application | “Happy Mother”    No fixed number of sessions: self-guided use  Duration: 8 weeks  Average use was 3 times/week | Control group: Educational leaflet on postpartum depression (definition, symptoms, causes, coping methods) | End of treatment (8 weeks)  Follow-up at 3 months after the end of treatment data collection | 12-item Multidimensional Scale of Perceived Social Support | N/A | Baseline:  Control group:  Mean= 84.17 (*SD*=14.44)  Intervention group:  Mean= 85.95 (*SD*=15.09)  8 weeks:  Control group:  Mean= 85.31 (*SD*=18.75)  Intervention group:  Mean= 88.54 (*SD*=11.50)  3-month follow-up:  Control group:  Mean= 87.81 (*SD*=18.61)  Intervention group: Mean= 90.38 (*SD*=14.91) | | Social support did not differ significantly between the intervention and control group post-intervention or at 3-month follow-up (*F*= (1.71) = 0.58, *p* =.45) or across time (*F* (2,142) = 0.14, *p* =.87) | High concerns |
| **Perceived social support and loneliness** | | | | | | | | | | | | |
| **Online/Digital intervention** | | | | | | | | | | | | |
| Shorey et al., 2019**    Tertiary hospital  Singapore | | 138 postnatal mothers at-risk of postpartum depression based on the Edinburgh Postnatal Depression Scale (scoring ≥9)    Mean age = 32.05 years (SD = 4.35)  Age range = 23–43 years    Ethnicity: Chinese: 58 (42%)  Malay: 47 (34.1%)  Indian: 16 (11.6%)  Other: 17 (12.3%)    Females:  138 (100%) | Technology-based peer-support intervention program (PIP) | Standard postnatal care plus peer-support intervention program (PIP)    At least 4 sessions in total (1 session per week)  Duration: 4 weeks | Standard postnatal care provided by hospital (obstetrician/nurse/lactation support, follow-up appointments, breastfeeding hotline) | End of treatment (4 weeks)  Follow up at 1 month and 3 months post-partum | Loneliness:  10-item University of California, Los Angeles Loneliness Scale (ULS)    Social support: 8- item Perceived Social Support for Parenting (PSSP) Scale | Age,  Marital status, Antenatal class Attendance, Baby’s gender, Confinement period | Loneliness:  At 1 month:  Intervention group:  Mean= 41.6 (*SD*= 5.5)  Control group:  Mean= 44.0 (*SD*=5.6)  Adjusted mean difference= -2.45, 95% CI [−7.0, 2.1], *p* = .29  3 months:  Intervention group:  Mean= 39.5 (*SD*= 5.4)  Control group:  Mean= 42.9 (*SD*=5.6)  Adjusted mean difference= -3.43, 95% CI [-8.0, 1.1], *p* =.14  Social support:  At 1 month:  Intervention group:  Mean= 32.3 (*SD*= 2.6)  Control group:  Mean= 33.2 (*SD*=2.6)  Adjusted mean difference= -0.86, 95% CI [-3.9 to 2.1], *p* =.57  3 months:  Intervention group:  Mean= 35.4 (*SD*= 4.4)  Control group:  Mean= 35.9 (*SD*=4.3)  Adjusted mean difference= -0.53, 95% CI [-4.7, 3.6], *p* =.78 | There were no significant differences in loneliness between the groups at 1 month (*d*=-2.45, 95% CI [7.0, 2.1], *p* = .29) and at 3 months (*d=* -3.43, 95% CI [-8.0, 1.1], *p* =.14)    There were no significant differences in loneliness between the groups over time (*d=*-2.16; 95%CI [-4.4, 0.0], *p* =.06)    There were no significant differences in social support between the groups at 1 month (*d*=0.86; 95% CI [-3.9, 2.1], *p* =.57) and 3 months (*d*=−0.53; 95% CI [-4.7, 3.6], *p* =.80)    There were no significant differences in social support between the groups over time (*d=*0.86; 95%CI [-0.9, 2.6], *p* =.33) | | High concerns |

*Subjective social isolation as the primary outcome

**Subjective social isolation as one of the main outcomes or secondary outcome

N/A: Not available

## Table 3. Characteristics of trials assessing loneliness or/and perceived social support as an outcome of interest among people with common mental health conditions (depression and anxiety) (*n*=5)

| Author  Study setting  Type of sample | Sample characteristics (Age, gender, ethnicity) | Intervention  type/ categorisation | Intervention name, number of sessions and total duration | Comparator group | Follow up period(s) for data collection | Loneliness/perceived social support measure | Confounders adjusted for | Descriptive and summary statistics (e.g Mean (M), Standard Deviation (SD), t test) | Summary of findings: Effectiveness of the intervention | Quality assessment rating |
| --- | --- | --- | --- | --- | --- | --- | --- | --- | --- | --- |
| **Loneliness** | | | | | | | | | | |
| **Group-based intervention** | | | | | | | | | | |
| Smith et al., 2021*    University emotional health clinic, and advertisements in newsletters/community organisations  Sydney, Australia | A clinical sample of 62 older adults with symptoms of both DSM-IV anxiety and unipolar mood disorder, with either being the primary diagnosis  (*n* = 54 (87.1%) met full diagnostic criteria for both)  Mean age: 67.44 years (SD= 6.19)  Age range: 60–84 years    Female: 64.52%  . | Group-based Cognitive Behavioural Therapy (CBT) | “Aging Wisely”: Group CBT program  Weekly two-hour sessions  Duration: 12 weeks  Mean number of sessions attended: 9.31 (SD = 3.11) | Waitlist control:  3 month no-contact condition | End of treatment (12 weeks)  Follow up at 3-month post-treatment for CBT group only  (No follow up data for the waitlist group) | Single item (“I felt lonely”) from Center for Epidemiologic Studies Depression Scale | Baseline cognition (Addenbrooke’s Cognitive Examination – Revised, ACE-R)    Baseline self-reported depression and anxiety | Baseline  loneliness:    Waitlist group:  Mean= 1.36 (*SD*=0.97)  Intervention group:  Mean= 1.70 (*SD*=0.82)  Pre-treatment loneliness:  Waitlist group:  Estimated marginal mean= 1.36 (*SE*=0.169)  Intervention group:  Estimated marginal mean= 1.59 (*SE*=0.209)  Post-treatment loneliness:  Waitlist group:  Estimated marginal mean = 1.24, (*SE* = 0.194)  Intervention group:  Estimated marginal mean= 0.59 (*SE* = 0.169) | The group by time interaction showed significant improvement in loneliness among the intervention group compared to the waitlist group over time (*F* (1,40.609) = 7.070, *p* = .011, *d* = -0.65) | High concerns |
| Syed, 2017*  Residential aged care facilities  Malaysia | 34 participants aged 60 or older who are lonely and/or have anxiety and depression based on the Geriatric Depression Inventory and Geriatric Anxiety Inventory  Control group: Mean age: 69 years (SD = 6.60)  Females: 56%  Intervention group:  Mean age: 67 years (SD = 4.67)  Females: 50% | Spiritual reminiscence therapy based on social identity theory to foster group belonging and connectedness | Spiritual Reminiscence Therapy  One 60–90-minute session per week  Duration: 6 weeks | Attention control group (active social interaction with facilitator and general activities such as painting) | End of treatment (a week after end of intervention)  Follow-up at 3 months | 20-item UCLA Loneliness Scale | N/A | Baseline: Control group: Mean= 45.56 (*SD* = 9.50)  Intervention group: Mean= 46.22 (*SD* = 13.48)  Post-intervention: Control group: Mean= 41.50 (*SD* = 5.45)  Intervention group: Mean= 41.89 (*SD* = 10.95)  3-month follow-up:  Control group: Mean= 40.19 (*SD* = 7.14)  Intervention group: Mean= 40.56 (*SD* = 9.61) | There were no significant differences in loneliness between the intervention and control group (Main effect of group: *F* (1,32) = 0.03, *p* = .87); group by time interaction: *F* (2,31) = 0.01, *p* = .99) | High concerns |
| **Online/Digital intervention** | | | | | | | | | | |
| Karkosz et al., 2024*  Participants recruited through Facebook and Instagram adverts  Poland | 81 participants with at least mild symptoms of depression or anxiety, based on the Centre of Epidemiologic Studies Depression Scale-Revised (CESD-R ≥16) or Penn State Worry Questionnaire PSWQ ≥50).    Intervention group:  Mean age: 26.60 years (SD = 5.06)  Females: 29 (73%)  Control group:  Mean age: 24.76 years (SD= 4.01)    Females: 29 (71%)    Ethnicity: N/A | Agent-guided Cognitive Behavioural Therapy (AG-CBT) delivered via chatbot | “Fido” – a Polish-language therapy-supporting chatbot (integrated into Facebook Messenger)    Duration: 2 weeks    No fixed number of sessions; self-paced. | Self-help book Mind Over Mood (Polish translation, chapters 1–6 & 12) consisting of psychoeducational content with self-help exercises | End of treatment (2 weeks)  Follow-up at 1 month | 20-item Revised UCLA Loneliness Scale | N/A | Baseline loneliness:  Control group:  Mean= 42.39 (*SD*=13.25)  Intervention group:  Mean= 45.44 (*SD*=12.15)  Post-intervention:  Control group:  Mean= 41.49 (*SD*=13.42)  Intervention group:  Mean= 43.06 (*SD*=13.38)  Mean difference=-1.56, 95% CI [-3.23, 0.11]  1 month follow-up:  Control group:  Mean= 43.69  (*SD*=12.84)  Intervention group:  Mean= 41.67 (*SD*=13.08)  Mean difference=-1.11, 95% CI [-3.14, 0.92] | There were no significant differences in loneliness between the intervention and control group (*F* (1,66) = 0.689, *p* =.409)  There was no significant time by group interaction (*F* (1,66) =1.130, *p* =.257) | High concerns |
| **Mixed interventions (Individual and group based)** | | | | | | | | | | |
| Zhang et al., 2024**  Participants recruited from three randomly selected communities  Tianshui, China | 133 community-dwelling elderly aged 60 or above with symptoms of anxiety or depression based on the self-rating depression scale and self-rating anxiety scale.  Mean age: 67.99 years (SD=6.40)  Females: 80 (60%) | Individual counselling and psychoeducation (e.g. coping skills, cognitive restructuring techniques) | Individuals were provided with individual psychological counselling, nursing and group-based sessions, 2 times per month, each session lasts at least 60 min  Duration: 3 months | Supportive treatment consisting of brief mental health education and educational pamphlet | Assessments at the end of week 4, 8, and 12  Follow-up at 1 year | 20-item UCLA Loneliness Scale | N/A | Baseline loneliness:  Intervention:  Mean= 29.84 (*SD*=9.48)  Control: Mean= 31.88 (*SD*=10.10)  4 weeks:  Intervention group:  Mean= 29.03  (*SD*=8.39)  Control group:  Mean= 31.89 (*SD*=10.10)  8 weeks:  Intervention group: Mean= 28.90  (*SD*=7.92)  Control group: Mean= 31.44  (*SD*=9.37)  12 weeks:  Intervention group: Mean= 28.58  (*SD*=7.87)  Control group:  Mean= 31.82  (*SD*=9.98)  1 year follow-up:  Intervention:  Mean= 28.64  (*SD*=8.32)  Control:  Mean= 31.86 (*SD*=10.10) | The intervention group reported a greater reduction in loneliness compared to the control group at one year follow-up (*F*=5.781, *p* = .009)  There were no significant group by time interactions (*F*=1.052, *p* = .247) | High concerns |
| **Perceived social support** | | | | | | | | | | |
| **Group-based intervention** | | | | | | | | | | |
| Ruiz-Comellas et al., 2022**  Participants recruited from electronic medical data-base records  Spain | 90 participants over the age of 64 diagnosed with depression or anxiety based on the Beck Depression Inventory or/and Generalised Anxiety Disorder Scale and report little social support  Intervention group:  Mean age: 75 years (SD=6.02)  Females: 71.43%  Control group:  Mean age: 74 years (SD=5.18)  Females: 81.81% | Group based moderate intensity physical activity programme | Physical activity (PA) programme  Two days per week  Duration: 4 months | Treatment as usual at primary care centres | End of treatment (4 months)  Follow up at 12 months | DUKE-11 Functional Social Support Questionnaire | Baseline general anxiety, depression, and social support scores,  sex | Baseline:  Control group: Mean= 26.55 (SD=11.05)  Scoring <32: 68.89%  Scoring ≥ 32: 31.11%  Intervention group:  Mean= 26.84 (*SD*=12.29)  Scoring <32: 64.44%  Scoring ≥ 32: 35.56%  4 month follow up:  Control group: Mean= 28.72 (*SD*=11.93)  Scoring <32: 55.5%  Scoring ≥ 32: 44.4%  Mean difference = 2.97 (*SD*=9.81), 95% CI [-0.35, 6.29), *p* =.078  Intervention group:  Mean= 21.73 (*SD*=10.38)  Scoring <32: 76.5%  Scoring ≥ 32: 23.5%  Mean difference= -3.59 (*SD*=11.68), 95% CI [-7.66, 0.49], *p* =.013 | There were significant between group differences with significant improvements in social support in the intervention group compared to the control group (*p*=.01) | High concerns |

*Subjective social isolation as the primary outcome

**Subjective social isolation as one of the main outcomes or secondary outcome

N/A: Not available

## Table 4. Characteristics of trials assessing loneliness or/and perceived social support as an outcome of interest among people with social anxiety disorder (*n*=2)

| Author  Study setting  Type of sample | Sample characteristics (Age, gender, ethnicity) | Intervention  type/ categorisation | Intervention name, number of sessions and total duration | Comparator group | Follow up period(s) for data collection | Loneliness/perceived social support measure | Confounders adjusted for | Descriptive and summary statistics (e.g Mean (M), Standard Deviation (SD), t test) | Summary of findings: Effectiveness of the intervention | Quality assessment rating |
| --- | --- | --- | --- | --- | --- | --- | --- | --- | --- | --- |
| **Loneliness** | | | | | | | | | | |
| **Group-based intervention** | | | | | | | | | | |
| O’Day et al., 2021**  Participants recruited through clinical referrals and community listings  USA | A clinical sample of 108 treatment-seeking individuals with social anxiety disorder  Mean age: 32.7 years (SD = 8.0)  Females: 55.6%  Ethnicity:  Cognitive behavioural group therapy (CBGT):  White: 18 (50%)  Asian American:  15 (41.7%)  Latino/Hispanic: 2 (5.6%)  More than one race: 1 (2.8%)  Mindfulness-based stress reduction (MBSR): White:14 (38%)  Asian American: 13 (36.1)  Latino/Hispanic: 7 (19.4%)  African American/Black:1 (2.8%)  More than one race: 1 (2.8%)  Control group: White: 15 (41.7%)  Asian American: 14 (38.9%)  Latino/Hispanic: 1 (2.8%)  American Indian: 1 (2.8%)  More than one race: 5 (13.9%) | Two interventions compared to waitlist control group  Cognitive-behavioural group therapy (CGBT)  Mindfulness-based stress reduction (MBSR) | Cognitive-behavioural group therapy  2.5-hour weekly sessions  Duration: N/A  Mindfulness-based stress reduction  Twelve 2.5 hour weekly sessions  Duration: N/A | Waitlist control group | End of treatment (12 weeks)  Follow-up at 3-, 6-, 9- and 12-months | 8-item UCLA Loneliness Scale | N/A | Baseline loneliness:  CBGT:  Estimated marginal mean (EMM)= 24.14 (*SE*=0.78)  MBSR:  EMM= 25.21  (*SE*=0.72)  Control:  EMM= 25.03  (*SE*=0.78)  Post-intervention  CBGT:  EMM= 20.63 (*SE*=0.83)  MBSR:  EMM= 21.13  (*SE*=0.79)  Control:  EMM= 24.73 (*SE*=0.79) | Loneliness was significantly lower for the CBGT group compared to the waitlist group (*t* (102.48) = 2.96, *p* = .004, *d =* 0.29) and for MBSR compared to the waitlist group (*t* (103.82) = 3.57, *p* = .001, *d =* 0.34)  The was a significant group by time interaction (*F* (2,104.02) = 7.36, *p =* .001, η²ₚ  = .12)  There was no significant difference in loneliness between CBGT and MBSR  (*t* (105.86) = 0.53, *p* = .60, *d* = 0.05) | High concerns |
| **Online/Digital intervention** | | | | | | | | | | |
| Mueller & Cougle, 2023*  Participants recruited from the community and undergraduate psychology student research subject pool  United States | 55 participants with social anxiety disorder based on the Social Phobia Inventory (scores ≥19), and diagnosis of SAD determined by the MINI International Neuropsychiatric Interview  Intervention group:  Mean age: 19 years (SD= 1.39)  Female: 21 (77.8%)  Ethnicity:  Hispanic or Latino: 9 (34.6%)  Not Hispanic or Latino: 17 (65.4%)  Control group:  Mean age: 19.92 years (SD= 2.84)  Female: 25 (92.6%)  Ethnicity:  Hispanic or Latino: 3 (11.1%)  Not Hispanic or Latino 24 (84.9%) | A technology-based multicomponent intervention including expressive writing, psychoeducation, social skills training, and exposure exercise | Building Closer Friendships (BCF) intervention  4 sessions, with exercises and homework to practice skills  Duration: 4 weeks | Waitlist control condition | Follow-up at 1-month | 20-item UCLA Loneliness Scale | N/A | Baseline  Control group: Mean= 47.77 (*SD*=11.54)  Intervention group:  Mean=47.52 (*SD*=13.06)  Post-intervention  Control group: Mean= 44.71 (*SD*=13.94)  Intervention group: Mean= 45.33 (*SD*=12.57)  Follow-Up  Control group: Mean= 47.81  (*SD*=16.19)  Intervention group:  Mean= 43.11  (*SD*=14.74) | There was no significant effect of group on loneliness at mid-treatment (β = 0.06, *p* = .45, *sr²* = 0.003), or post-treatment (β = 0.04, *p* = .62, *sr²* = 0.002) or at 1 month follow-up (β *=* 0.15*, p* = .08, *sr²* = 0.01) | High concerns |

*Subjective social isolation as the primary outcome

**Subjective social isolation as one of the main outcomes or secondary outcome

N/A: Not available

## Table 5. Characteristics of trials assessing loneliness or/and perceived social support as an outcome of interest among people with psychosis (*n*=4)

| Author  Study setting  Type of sample | Sample characteristics (Age, gender, ethnicity) | Intervention  type/ categorisation | Intervention name, number of sessions and total duration | Comparator group | Follow up period(s) for data collection | Loneliness/perceived social support measure | Confounders adjusted for | Descriptive and summary statistics (e.g Mean (M), Standard Deviation (SD), t test) | Summary of findings: Effectiveness of the intervention | Quality assessment rating |
| --- | --- | --- | --- | --- | --- | --- | --- | --- | --- | --- |
| **Loneliness** | | | | | | | | | | |
| **Group-based intervention** | | | | | | | | | | |
| Hogg et al., 2025*  Mental health services including adult mental health services and early intervention services, and mental health charities  United Kingdom | 40 adults with self-identified psychosis, verified through clinical research interview    Individual-format (n=20):  Mean age: 38.75 years (SD=12.10)  Females: 11 (55%)    Group-format (n=20):  Mean age: 43.65 years (SD=12.52)  Females: 12 (60%) | Group based intervention focusing on developing, maintaining, and strengthening social connections and group ties | Groups for Health (G4H) intervention adapted for individuals with psychosis (feasibility study)    5 sessions for 60 minutes, followed by an additional, informal check-in  Duration: 2 months | Individual format G4H intervention | End of treatment (session 4)  Follow-ups at 1 and 6 months | 8-item UCLA Loneliness Scale | NA | Baseline loneliness:  Individual format:  Mean= 17.30 (*SD*= 3.25)  Group-format control: Mean= 17.42 (*SD*=3.17)  End of treatment:  Individual format:  Mean= 15.90 (*SD*= 3.18)  Group format:  Mean= 16.11 (*SD*=3.76)  1-month follow-up:  Individual format:  Mean= 13.60 (*SD*=2.84)  Group-format control:  Mean= 14.95 (*SD*=4.48)  6-month follow-up:  Individual format:  Mean= 13.75 (*SD*=4.79)  Group-format control:  Mean= 15.63 (*SD* =4.30) | There were no significant between-format differences for  loneliness  There was a significant reduction in loneliness from baseline to 1-month follow-up, irrespective of intervention format (*F* (2,74) = 20.45, *p* < .001) (combined effect size: *d*=0.86) | High concerns |
| **Individual-based intervention** | | | | | | | | | | |
| Öztürk et al., 2025 **  Community mental health centre  Turkey | 61 individuals diagnosed with schizophrenia  Intervention group:  Mean age: 39.6 years (SD= 9.61)  Females: 17 (46.7%)  Control group:  Mean age: 41.55 years (SD=9.82)  Female:  14 (45.2%)  Ethnicity: N/A | Equine-assisted therapy | Equine-assisted therapy  Two 40-minute sessions per week  Duration: 8 weeks | Treatment as usual (activities offered in the community mental health service) | End of treatment (8 weeks) | 20-item UCLA Loneliness Scale | N/A | Baseline loneliness:  Control group:  Mean= 51.41 (*SD* =7.52)  Intervention group:  Mean= 50.16 (*SD*=9.24)  Post-treatment:  Control group:  Mean= 49.58 (*SD* =8.60)  Intervention group:  Mean= 41.33 (*SD* = 8.12)  Mean difference= -8.25, 95% CI: [-12.53, -3.95] | The equine assisted intervention group reported significantly lower loneliness scores compared to the control group (*d* = 0.99, 95% CI [-1.53, -0.44], *p* < .001) | High concerns |
| **Perceived social support and loneliness** | | | | | | | | | | |
| **Online/Digital intervention** | | | | | | | | | | |
| Alvarez-Jimenez et al., 2021**  Early psychosis intervention and prevention service  Melbourne, Australia | 170 first episode psychosis patients in remission from positive symptoms, and nearing discharge from early intervention services    Mean age: 20.91 years (SD=2.88)  Aged 16-27  Females: 80 (47.1%) | Supported socialisation: peer support and online therapy programme | Horyzons  Interactive online social therapy modules and peer-to-peer networking platform, open-ended | Treatment as usual (primary and tertiary mental health services) | End of treatment (18 months) | 20-item UCLA Loneliness Scale  19-item Medical Outcomes Study Social Support Survey, MOS-SSS | Age,  gender  Baseline outcomes    Duration of untreated psychosis | Loneliness:  Baseline:  Intervention group:  Mean= 46.06 (*SD*=0.89)  Control group:  Mean= 46.12 (*SD*=0.94).  18 months:  Intervention group:  Mean= 44.12 (*SD*=1.05)  Control group:  Mean= 45.07 (*SD*=1.10)    Mean difference= 0.94, 95% CI [-2.05, 3.94]  Social support:  Baseline:  Intervention group:  Mean= 71.11 (*SD*=1.68)  Control group:  Mean= 70.45 (*SD*=1.75)  18 months:  Intervention group:  Mean= 72.99 (*SD*=1.96)  Control group:  Mean= 73.08 (*SD*=2.05)  Mean difference = 0.08, 95% CI [-5.51, 5.68] | There were no significant differences in loneliness between the intervention and control group (β = 0.06, *p* =.54)  There were no significant differences in social support between the intervention and control group  (β = -0.003, *p* =.82) | Some concerns |
| **Mixed intervention (individual and group based)** | | | | | | | | | | |
| Vogel et al., 2023**  Participants recruited from Flexible Assertive Community teams  Netherland | 43 participants diagnosed with schizophrenia. 77.% and 62.5% of participants in the intervention and control group reported loneliness, respectively  Control group:  Median age: 42.5 years (IQR= 6.6)  Female: 31.2%  Intervention group:  Median age: 42.0 years (IQR= 18.0)  Females: 29.6% | Eating club: Nurse guided peer support groups and home-based skills training sessions | HospitalitY: Eating club  15 bi-weekly sessions consisting of:  30-120 minute face to face or telephone call home-based skills training  Guided peer support sessions in groups of 3: participants host dinners in their house for 120 minutes  Duration: 8 months | Waitlist control group  Receiving usual care | End of treatment (8 months)  Follow up at 12 months | De Jong Geirveld Loneliness scale  DUKE-11 Functional Social Support Questionnaire | N/A | Loneliness:  Baseline:  Control group:  Mean= 4.75 (*SD*=3.36)  Intervention group:  Mean= 6.51 (*SD*=3.04)  Post-intervention:  Control group:  Mean= 4.08 (*SD*=3.42)  Intervention group:  Mean= 5.47 (*SD*=3.04)  *B* = 0.51, *SE*= 0.95, 95% CI [-1.38, 2.10], *p* = .59  Follow-up:  Control group:  Mean= 4.10 (*SD*=4.23)  Intervention group:  Mean= 4.81 (*SD*=3.71)  *B* = 0.02, *SE*= 1.00, 95 CI% [-1.93, 2.14], *p* = .98  Social support:  Baseline:  Control group:  Mean= 4.00 (*SD*=0.92)  Intervention group:  Mean= 3.72 (*SD*=0.74)  Post-intervention:  Control group:  Mean= 4.08 (*SD*=0.78)  Intervention group:  Mean= 3.83 (*SD*=0.49)  *B*= -0.30, *SE*= 0.23, 95% CI [-0.48, 0.42], *p* = .90  Follow-up:  Control group:  Mean= 4.06 (*SD*=0.69)  Intervention group:  Mean= 3.64 (*SD*=0.87)  *B* = -0.25, *SE*=0.24, 95% CI [-0.73, -0.23], *p* = .31 | There were no statistically significant differences between the control and intervention group on perceived social support (end of treatment: *p* = .90 ; follow-up: *p* = .31) or loneliness (end of treatment: *p* = .59; follow-up: *p* = .98) | High concerns |

*Subjective social isolation as the primary outcome

**Subjective social isolation as one of the main outcomes or secondary outcome

N/A: Not available

## Table 6. Characteristics of trials assessing loneliness or/and perceived social support as an outcome of interest among people with PTSD (*n*=4)

| Author  Study setting  Type of sample | Sample characteristics (Age, gender, ethnicity) | Intervention  type/ categorisation | Intervention name, number of sessions and total duration | Comparator group | Follow up period(s) for data collection | Loneliness/perceived social support measure | Confounders adjusted for | Descriptive and summary statistics (e.g Mean (M), Standard Deviation (SD), t test) | Summary of findings: Effectiveness of the intervention | Quality assessment rating |
| --- | --- | --- | --- | --- | --- | --- | --- | --- | --- | --- |
| **Perceived social support** | | | | | | | | | | |
| **Group-based interventions** | | | | | | | | | | |
| Amin et al., 2020 **  Five public schools in flood affected areas in Pakistan  Pakistan | 75 elementary school students with post-traumatic stress disorder assessed using the Children’s Revised Impact of Event Scale (scores ≥30)  Mean age: 11.43 years (SD=1.44)  Females: 26 (34.7%)  Ethnicity: N/A | School-based cognitive behavioural therapy | Support for Students Exposed to Trauma (SSET)  Ten 45-minute-long sessions  Duration: 12 weeks | Routine activities (e.g. playing outside) | End of treatment (12 weeks) | 60-item Child and Adolescent Social Support Scale (CASSS) | Age, gender, socioeconomic status, parental education | Baseline social support:  Control group:  Mean= 127.35  (*SD*= 15.80)  Intervention group:  Mean= 131.84  (*SD*= 22.67)  Post-intervention:  Control group: Mean= 126.97 (*SD*=15.67)  Intervention group:  Mean= 143.68 (*SD*= 20.57) | There is a significant between group differences (*F* (1,73) = 6.09, *p* < .05, η2=.08) and group by time interaction (*F* (1, 73) = 50.74, *p* < .001, η2 = .41) indicating that the SSET group reported greater social support compared to the control group | Some concerns |
| **Individual-based intervention** | | | | | | | | | | |
| Birkeland et al., 2020**  Children and youth recruited from the Norwegian centre for violence and traumatic stress  Norway | 156 children and youth who have been exposed to trauma  Mean age: 15.1 years year (age range:10-18)  Females: 79.5% | Cognitive behavioural therapy | Trauma focused cognitive behavioural therapy (TF-CBT)  12-15 sessions | Treatment as usual (participant was provided with suitable therapy depending on participant’s needs) | Mid treatment (after 6th session)  End of treatment (after sessions 12-15)  Follow-up at 12 and 18 months | DUKE-11 Functional Social Support Questionnaire | Therapy condition, age, gender, caregiver participation | Reported only for the total sample:  Baseline for perceived social support:  Mean= 28.00 (*SD*= 5.69)  Mid-treatment:  Mean= 29.07 (*SD*=5.93)  Post treatment:  Mean= 30.19 (*SD*=5.52)  12-month follow-up:  Mean= 30.35 (*SD* =4.89)  18-month follow-up:  Mean= 30.97 (*SD* =4.66) | The intervention did not result in greater improvements in perceived social support compared to the control group (β = −0.18, *p* = .146) | High concerns |
| Bourassa et al., 2020 **  Participants recruited from a large military installation using referrals from healthcare providers or self-referrals from recruitment flyers  USA | 162 active-duty army soldiers with posttraumatic stress disorder  based on the Clinician Admistrated PTSD scale  Prolonged exposure:  Mean age: 30.9 years (SD = 7.1)  Females: 5.6%  Ethnicity: White: 55.6%  African America: 9.3%  Asian 5.6%  Hispanic: 22.2%  Other: 7.5%  Prolonged exposure plus virtual reality:  Mean age: 29.5 years (SD = 6.5)  Females: 3.7%  Ethnicity:  White: 72.2% African American: 3.7%  Asian: 7.4%  Hispanic: 13.0%  Other: 3.8%  Control group:  Mean age: 30.4 years (SD = 6.5)  Females: 1.9%  Ethnicity: White: 51.9%  African American: 14.8%  Asian: 5.6%  Hispanic: 16.7%  Other: 11.2% | Prolonged exposure therapy (either with or without virtual reality) | Prolonged exposure therapy  10 once or twice weekly 90 to 120-minute sessions  Duration: minimum 5 weeks | Minimal attention waitlist control | End of treatment (3 months)  Follow up at 6 months | The Revised Behavior and Symptom Identification Scale: Social Support subscale (BASIS-SS) | Baseline levels of perceived social support | Baseline social support:  Control group:  Mean= 1.84 (*SD*=0.75)  Traditional exposure therapy:  Mean= 1.96 (*SD*=0.80)  Virtual reality exposure therapy:  Mean= 1.76 (*SD*=0.70)  Post-treatment:  Control group:  Mean= 1.86 (*SD*=0.91)  Traditional virtual reality:  Mean= 2.46 (*SD*=0.97)  Virtual reality exposure therapy:  Mean= 2.14 (*SD*=0.95) | The exposure intervention groups experience greater improvement in social support from baseline to mid-treatment (β = 0.29, 95% CI [0.12, 0.46], *p* = .029), and at post-treatment (β = 0.43, 95% CI [0.13, 0.73], *p* = .004), compared to the waitlist control group | High concerns |
| Campbell et al., 2019**  Two PTSD specialty clinics in Veterans Health Administration facilities  Pacific Northwest of the USA | 80 veterans with a current PTSD diagnosis, determined by clinical interviews  Mean age: 30 years (SD = 6.66)  Females: 5 (6.3%)  Ethnicity:  White/ Caucasian: 62 (77.5%)  Black/African American: 4 (5%)  Asian/ Pacific Islander: 4 (5%) Native American: 1(1.3%)  Latino: 3 (3.8%)  Other 6 (7.5%) | Behavioural activation psychotherapy (BA) | Behavioural activation (BA)  Up to eight individual 45- to 60-minute psychotherapy sessions  Duration: not specified | Treatment as usual (TAU) (alternative psychotherapies or pharmacotherapy) | Assessment at post-treatment and three-month follow-up | Sarason Social Support Questionnaire – Short Form: Satisfaction with Support Questions (SSQS) | Gender, baseline PTSD, marital status | N/A | There were no observed improvements in social support in the BA group compared to the control group (test statistics not reported) | High concerns |

*Subjective social isolation as the primary outcome

**Subjective social isolation as one of the main outcomes or secondary outcome

N/A: Not available

## Table 7. Characteristics of trials assessing loneliness or/and perceived social support as an outcome of interest in samples with mixed mental health conditions (*n*=8)

| Author    Study setting    Type of sample | Sample characteristics (Age, gender, ethnicity) | Intervention  type/  categorisation | Intervention name, number of sessions and total duration | Comparator  group | Follow up period(s) for data collection | Loneliness/perceived social  support  measure | Confounders adjusted for | Descriptive and summary statistics (e.g Mean (M), Standard Deviation (SD), t test) | Summary of findings: Effectiveness of the intervention | Quality assessment rating |
| --- | --- | --- | --- | --- | --- | --- | --- | --- | --- | --- |
| **Loneliness** | | | | | | | | | | |
| **Group-based interventions** | | | | | | | | | | |
| Cruwys et al., 2021*    Two  community and university based mental health services  Australia | 174 young people (aged 15- to 25-years) seeking mental healthcare, who met criteria for depression based on the Patient Health Questionnaire (PHQ-9) (scores ≥ 5), or had any mental health condition (diagnosed by a mental health professional)    Mean age: 18.94 years (SD = 1.96)  Females: 131  (75%)    Ethnicity:  White: 79 (45.4%)  Asian: 83 (47.7%)  Indigenous: 6 (3.4%)  Black: 3 (1.7%)  Middle Eastern: 2 (1.1%)  Not disclosed: 1 (0.6%) | Group-based psychotherapy, informed by social identity theory, focusing on building group-based belonging | Groups 4 Health (G4H)    Four weekly 75-minute sessions, a further review session one month later | The Blues Program    Dose-controlled manualised group-based CBT for depression:  Five 75-minute  sessions | Assessment after each session and at end of treatment    Follow up at 6 months and 12 months post- treatment | 4-item UCLA Loneliness Scale | N/A | Baseline loneliness:    Control group:  Mean= 51.95  (*SD*= 9.94)    Intervention group:  Mean= 53.60  (*SD*= 9.90)    Post-treatment:  Control group:  Mean = 43.4  (*SD*=11.18)  Intervention group:  Mean= 42.19  (*SD*=10.22)  6 month follow-up:  Control group:  Mean= 43.07  (*SD*=13.23)  Intervention group:  Mean= 41.56  (*SD*=9.36)  1 year follow-up:  Control group:  Mean= 43.92  (*SD*=12.35)  Intervention group:  Mean= 41.92  (*SD*=10.68) | The G4H group showed greater improvement in loneliness compared to the CBT condition (*t*(1090) = 2.12, *p* = .034)    The between-group difference at 12 months did not reach statistical significance (-0.679, 95% CI [-1.43, 0.07], *t*(67.4) = - 1.81, *p* = .075) | Some concerns |
| Haslam et al., 2019*    Community  and university health services in Australia | 120 adults diagnosed with a mental health condition or met criteria for depression based on the Patient Health Questionnaire (PHQ-9)    Mean age: 31.06 years (SD=12.80)    Females: 64% | Clinician-led manualised group-based intervention  focusing on building and maintaining positive social group identification | Groups 4 Health (G4H)    Four weekly 60- to 90-minute sessions, a further session 1 month following    Duration: 8 weeks | Treatment as usual (TAU) | End of treatment (8 weeks)    Follow up at 16 weeks | 8-item UCLA Loneliness Scale | Baseline loneliness, depression, GP visits, social anxiety, group memberships | Baseline loneliness:    Control group:  Mean= 25  (*SD*= 2.78)    Intervention group:  Mean= 25.13  (*SD*= 3.11)    G4H reported a mean decrease of 3.83 points (*SE* = 0.53, *d* = –1.04)    TAU group showed a smaller, non-significant decrease of 1.23 points (*SE* = 0.55, *d*= –0.33) | There were no significant between group differences (β *=* 0.140, SE=.189, *p*= .459)    The G4H intervention group showed a significantly greater reduction in loneliness compared to the control group overtime (Time by Condition: β = –0.743, SE = .218, *p*< .001)  The intervention group reported a significant reduction in loneliness (*t* (97.0) = 7.27, *p*=.001)but this was not observed in the control group (*p*=.098) | High concerns |
| **Individual-based intervention** | | | | | | | | | | |
| Radin et al., 2023*    A private non-profit health system    St Luke Health system in Idaho USA | 331 patients and 335 staff/providers with moderate-high loneliness, depression (based on the Patient Health Questionnaire-9), suicidal ideation (Colombia Suicide Severity Rating scale), psychological stress (NIH toolkit stress) , or/and anxiety (General Anxiety Disorder-7 scale)  Mean age: 43.1 year (SD=14.4)  Females: 82.7%  Ethnicity:  White: 93.2%  Non-Hispanic: 91.3% | Caring contact: non-demanding and caring  text messages | Two active interventions:    Caring contacts (CC): brief non-demanding and caring text messages    Caring contacts+ (CC+): brief non-demanding and caring text messages and introductory phone call    Weekly texts sent for the first 4 weeks, then week 6,8,10,12,16,  20 and 24    Duration: 6 months | N/A | End of treatment (6 months) | NIH Toolbox Social Relationship Scales Emotion Battery Loneliness measure | Baseline scores | Baseline:    CC patient group:  Mean= 64.4 (*SD*=9.9)    CC+ patient group:  Mean= 64.4 (*SD*=10.3)    6 months:    CC patient group:  Mean= 61.9 (*SD*=10.7)    CC+ patient group:  Mean= 60.8 (*SD*=10.3)    Adjusted mean difference= -1.0, 95% CI [-3.0, 1.0], *p*= .31      Baseline:    CC staff group:  Mean= 62.6 (*SD*=9.3)    CC+ staff group:  Mean= 62.5 (*SD*=9.5)    6 months:    CC staff group:  Mean= 61.2 (*SD*=11)    CC+ staff group:  Mean= 61.3 (*SD*=11.1)    Adjusted mean difference = 0.2, 95% CI –1.8, 2.2], *p*= .83 | There were no observed significant differences in loneliness between the CC and CC+ groups | Some concerns |
| **Online/Digital intervention** | | | | | | | | | | |
| Short et al., 2019    Veterans fromcommunity outpatient  services  USA | 46 veterans    Mood disorder: 47.2%  PTSD: 30.2%  Anxiety disorder: 64.2%  Substance misuse: 19.9%  98.1% of participants reported active suicidal ideation    Mean age: 48.4 years (SD = 13.70)  Females: 13.2%  Ethnicity:  African American: 58.5%  White: 37.7%  Other: 3.8% | Psychoeducation combined with cognitive bias modification  Computerised lap-based intervention | Mood intervention condition    One day per week    Duration: 3 weeks | Repeated contact control (prevention strategies, safety plans) | Follow up at 1 month | Interpersonal Needs Questionnaire: Thwarted Belonginess subscale | N/A | Baseline:  Control group:  Mean= 37.59 (*SD*=13.19)  Intervention group:  Mean= 36.16 (*SD*= 14.39)  1 month follow-up:  Control group:  Mean= 37.78 (*SD*= 13.21)  Intervention group:  Mean= 31.83 (*SD*= 14.81) | The intervention group reported significantly lower thwarted belongingness compared to the control group at follow-up (*B*= -9.93, *SE=*4.59, *p*=.036) | High concerns |
| **Mixed interventions (Individual and group based)** | | | | | | | | | | |
| Lloyd-Evans et al., 2020*    Two secondary mental health services in London  United Kingdom | 40 participants who met minimum threshold for loneliness and have a diagnosis of depression or anxiety or post-traumatic stress disorder or non-psychotic disorders    Mood disorder: 38%  Anxiety: 43%  Bipolar disorder: 3%  Behavioural syndromes: 3%  Personality disorder: 10%  Developmental disorder: 5%    Mean age: 43.1 years (SD=13.1)    Females: 29 (73%)    Ethnicity:  White: 64%  Mixed: 8%  Asian/Asian British:10%  Black/African/Caribbean/Black British:13%  Other:5% | Individual and group-based peer delivered socially focused programme | Community Navigator Programme    Ten, 1-hour long meetings and 3 group meetings    Duration: 6 months | Treatment as usual (standard treatment from mental health services) | End of treatment (6 months) | 11-item De Jong Giervald Scale | N/A | Baseline loneliness:    Control group:  Median= 10.5 (IQR=9.0-11.0)    Intervention group:  Median= 11.0 (IQR=10.0-11.0)    6 months:    Control group:  Median= 10.0 (IQR=7.0-11.0)    Intervention group:  Median= 9.0 (IQR=8.0-11.0) | The median for loneliness in the intervention group reduced from 11 at baseline to 9 at follow-up. The median for loneliness in the control group reduced from 10.5 at baseline to 10 at follow-up | High concerns |
| Russinova et al., 2023**    University based recovery-oriented services and outpatient services in Boston, Denver, Bridgeport, and Wakefield  USA | 185 participants  diagnosed with schizophrenia, bipolar disorder, depression, post-traumatic stress disorder, and other undefined conditions    Control group:  Mean age: 47.79 years (SD= 11.62)    Females: 61.5%    White: 52.7%  Black: 18.7%  Pacific Islander: 1.1%  Asian: 2.2%  American Indian: 3.3.%  Mixed: 22%    Intervention group:  Mean age: 47.39 years (SD= 11.99)    Females: 60.6%    Ethnicity:  White: 55.3%  Black: 20.2%  Asian: 1.1%  American Indian: 6.4%  Mixed: 17% | Community participation intervention  Peer-delivered individual and group sessions aimed at fostering self-efficacy and community integration | Bridging community gaps photovoice (BCGP)  Group component:  12 weekly 2-hour sessions with 2 booster sessions delivered a month after the end of the treatment      Duration: 6 months | Treatment as usual: Individual weekly support on an as needed basis | End of treatment  (6 months)    Follow ups at  9 months  12 months | 20-item UCLA Loneliness Scale | Controlled for clustering of observations | Baseline loneliness:    Control group:  Mean= 2.46 (*SD*= 0.59)    Intervention group:  Mean= 2.40 (*SD*= 0.58)    3 months:    Control group:  Mean= 2.30 (*SD*= 0.62)    Intervention group:  Mean= 2.31 (*SD*= 0.55)    6 months:  Control group:  Mean= 2.38 (*SD*= 0.70)    Intervention group:  Mean= 2.31 (*SD*=0.60)    9 months follow-up:    Control group:  Mean= 2.33 (*SD*= 0.61)    Intervention group:  Mean= 2.31 (*SD*= 0.58)    12 months:    Control group:  Mean= 2.37 (*SD*=0.60)    Intervention group:  Mean= 2.26 (*SD*=0.59) | There were no significant differences between the intervention and control group (*F*(1,160) = 0.00, *p* = .958)    There were no significant group by time interaction in loneliness (*F* (1,160) = 0.07, *p* = .792, *d*= -0.08) | High concerns |
| **Perceived social support** | | | | | | | | | | |
| **Individual-based intervention** | | | | | | | | | | |
| Laurila et al, 2024**    Psychiatric outpatient departments  Helsinki,  Finland | 326 adults aged 20-45 diagnosed with a mood or anxiety disorder based on the DSM-IV criteria    Mean age: 32.3 years (SD= 6.9)    Females: 76.1% | Psychoanalytically informed psychotherapy | Three active  interventions:  Solution-focused psychotherapy (SFT):  12 sessions once to twice a week    Short term psychodynamic psychotherapy (SPP):  20 sessions once a week    Longterm psychodynamic psychotherapy (LLP):  Two to three weekly sessions | N/A | Assessment at 1, 2, 3 ,4 and 5 years after the beginning of intervention | 13-item Brief Inventory of Social Support and Integration Scale (BISSI):  Perceived Availability of Social Support subscale | Adjusted for baseline social support (BISSI)    As-treated models additionally adjusted for treatment adherence and auxiliary psychiatric treatments | Baseline social support:  SPP group:  Mean= 2.14 (*SE*=0.07)    LPP group:  Mean= 2.01 (*SE*=0.07)    SFT group:  Mean= 1.91 (*SE*=0.08)    1 year:  SPP group:  Mean= 2.14 (*SE*=0.09)    LPP group:  Mean= 2.29 (*SE*=0.08)    SFT group:  Mean= 2.14 (*SE*=0.09)    Mean difference (SPP-LPP) = -0.20, 95% CI [-0.41, 0.01)    Mean difference (LPP-SFT) = 0.08, 95% CI [-0.14, 0.30)    2 years:  SPP group:  Mean= 2.19 (*SE*=0.10)    LPP group:  Mean= 2.30 (*SE*=0.09)    SFT group:  Mean= 2.26 (*SE*=0.11)    3 years:  SPP group:  Mean= 2.36 (*SE*=0.09)    LPP group:  Mean= 2.42 (*SE*=0.08)    SFT group:  Mean= 2.39 (*SE*=0.09)    4 years:  SPP group:  Mean= 2.42 (*SE*=0.09)    LPP group:  Mean= 2.28 (*SE*=0.08)    SFT group:  Mean= 2.41 (*SE*=0.10)    5 years:    SPP group:  Mean= 2.44 (*SE*=0.09)    LPP group:  Mean= 2.45 (*SE*=0.08)    SFT group:  Mean= 2.27 (*SE*=0.09)    Mean difference (SPP-LPP) = -0.09, 95% CI [-0.31, 0.13)    Mean difference (LPP-SFT) = 0.17, 95% CI [-0.06, 0.39] | There were no statistically significant differences in social support across the three intervention groups over the period of 5 years | High concerns |
| **Perceived social support and loneliness** | | | | | | | | | | |
| **Individual-based intervention** | | | | | | | | | | |
| Swinkels et al, 2023 **    Forensic psychiatric outpatient care department  Amsterdam | 102 forensic psychiatric outpatients  diagnosed with any psychiatric diagnosis according to DSM-IV-TR  90.2% of participants were diagnosed with multiple disorders    Mean age:  40.5 years (SD= 12.80)    Females: 12 (11.8%)    Ethnicity:  White: 41 (40.2%)  Black Caribbean or African: 24 (23.5%)  Arabic or North-African: 17 (16.7%)  Asian: 2 (2%)  Multiple ethnic groups: 18 (17.6%) | Supported  socialisation  intervention | Forensic network coaching provided by an external informal care institute and standard care    A couple of hours, once every two weeks    Duration: 12 months | Standard forensic psychiatric outpatient treatment such as ambulatory psychotherapies | Follow up at 18 months after intervention | 34-item- Social Support List Interactions (SSL-I)    11-item De Jong Gierveld Scale | Baseline value of the outcome and potential confounders (i.e., sex, age, ethnicity, type of forensic outpatient care site, duration of outpatient treatment)  Hospitalisation at baseline | Baseline social support  Control group:  Mean= 2.09  (*SD*=0.56)  Intervention group:  Mean= 2.16  (*SD*=0.52)    12 months social support  Control group:  Mean= 2.08  (*SD*=0.56)  Intervention group:  Mean= 2.24  (*SD*=0.53)    Adjusted mean difference=  0.138, 95% CI [-0.054, 0.330]    18 months social support  Control group:  Mean= 2.11  (*SD*=0.58)  Intervention group:  Mean= 2.24  (*SD*=0.51)    Adjusted mean difference=  0.121, [-0.076, 0.318]  Loneliness baseline  Control group:  Mean= 3.41  (*SD*=0.77)  Intervention group:  Mean= 3.22  (*SD*=0.80)    12 months loneliness  Control group:  Mean= 3.03  (*SD*=0.98)  Intervention group:  Mean= 2.79  (*SD*=0.77)    Adjusted mean difference=  -0.162, 95% CI [-0.478, 0.153]    18 months loneliness  Control group:  Mean= 2.91  (*SD*=0.86)  Intervention group:  Mean= 2.79  (*SD*=0.83)    Adjusted mean difference= 0.013, 95% CI [-0.311, 0.338] | There were no significant differences in social support between the intervention group and control group over time (adjusted effect = 0.130, 95% CI [-0.042 to 0.302], not significant)    There were no significant differences in loneliness between the intervention and control group over time (adjusted effect = -0.078, 95% CI [-0.349 to 0.192], not significant) | High concerns |

 *Subjective social isolation as the primary outcome

**Subjective social isolation as one of the main outcomes and secondary outcome

N/A: Not available

# **Appendix 5: Findings on other outcomes of interest**

Table 1. Characteristics of included studies assessing other outcomes of interest: symptoms of mental health conditions, service use, quality of life, and health status

| Author | Intervention type/categorisation | Intervention duration and follow-up periods | Other outcomes of interest: Measures | Key findings for other outcomes of interest in this review: service use, quality of life, health status, and symptoms of mental health |
| --- | --- | --- | --- | --- |
| Alvarez-Jimenez et al., 2021 | Peer support and online therapy intervention | Duration: 18 months | Positive and negative psychotic symptoms (Positive and Negative Syndrome Scale) ***  Quality of life (Assessment of Quality of Life – 8D) ***  Depression (Calgary Depression Scale for Schizophrenia) ***  Service use (hospital admissions and use of emergency services) *** | No statistically significant differences between the intervention and control group were observed for psychotic symptoms, quality of life, and depression    The intervention group had significantly lower rates of emergency service use than the control group (19% vs. 39%; Odds Ratio= 0.31, 95% CI [0.11, 0.86], *p* = .03) |
| Amin et al., 2020 | Cognitive-behavioural therapy | Duration: 12 weeks | Post-traumatic stress symptoms (Child PTSD Symptoms Scale) ** | The intervention group showed a significant reduction in post-traumatic stress symptoms compared to the control group (*F* (1, 73) = 68.99, *p* < .001) |
| Ayar & Sabancioğullari, 2022 | Solution-oriented therapy | Duration: 20 days  Follow up at 12 weeks | Depression (Beck Depression Inventory) ** | The intervention group showed significant reductions in depressive symptoms compared to the control group at post-treatment and 12-month follow-up (*t* = 2.14, *p* = .036; *t* = 2.73, *p* = .008 respectively) |
| Birkeland et al., 2020 | Trauma-focused cognitive behavioural therapy | Duration: N/A  Follow-up at 12 and 18 months | Post-traumatic stress symptoms (Child PTSD Symptoms Scale) * | Therapy condition predicted rate of change in PTSD symptoms indicating that the intervention group experienced greater reduction in PTSD symptoms compared to the control group (β = 0.23, *p* = .025) |
| Bourassa et al., 2020 | Two active intervention groups:  Prolonged exposure therapy (with or without virtual reality) | Duration: minimum 5 weeks  Follow up at 6 months | Posttraumatic stress disorder  (Clinician Administered PTSD Scale) * | The two exposure therapy groups reported greater reduction in PTSD symptoms compared to the control group (prolonged exposure group: *b* = -21.90, 95% CI [-31.60, -12.19], *p* <.001, *d* = - 1.33; virtual reality exposure group: *b* = -13.23, 95% CI [-23.22, -3.23], *p* = .005, *d* = -0.81) |
| Boyd et al., 2017 | Parenting program plus depression psychoeducation | Duration: 12 weeks | Depression (Beck Depression Inventory - II) ** | There were no differences in depression symptom scores between the intervention and control group  (Mean difference = -3.4, 95% CI [-8.7,1.9], not significant) |
| Conley et al., 2024 | Interpersonal psychotherapy | Duration: 11 weeks | Depression (9-item Patient Health Questionnaire) **  Anxiety (7-item General Anxiety Disorder Scale) **  Quality of life (26-item World Health Organisation Quality of Life Questionnaire) ** | There were significant group by time interactions indicating that the intervention group experienced greater reduction in depressive symptoms overtime compared to the control group (*F* (1, 155) = 11.81, η2 = .07, *p* = <.001).  No significant differences were observed for anxiety (*p* = .21) or quality of life (*p* = .11) |
| Dol et al., 2025 | Daily text messages coaching program focused on maternal mental health | Duration: 6-weeks  Follow up at 6 months | Postpartum anxiety (Postpartum Specific Anxiety Scale) **  Postpartum depression (10-item Edinburgh Postnatal Depression Scale) ** | There was no statistically significant group difference in postpartum anxiety scores at 6 months postpartum (*F* (1,131) =1.077, *p* =.30, η2=.00)  There was no statistically significant difference in postpartum depression scores at 6 months postpartum (*F* (1,131) = 1.680, *p* =.20, η2=.013) |
| aFelton et al., 2019 | Interpersonal psychotherapy | Duration: 10 weeks | Depressive symptoms (21-item Hamilton Depression Rating Scale; HAM-D) **  PTSD (17-item PTSD Checklist - Civilian Version; PCL-C) ** | Compared with TAU alone, IPT + TAU predicted decreases in depressive symptoms (*b* = −2.99, *SE* = 1.32, *p* = .03). There was no significant difference between groups in PTSD symptoms (β= −.12, *p* = .088) |
| Haslam et al., 2019 | Supported socialisation: Group based intervention focusing on building and maintaining positive social group identification and belonging | Duration: 8 weeks  Follow up at 16 weeks | Depression (Depression, Anxiety and Stress Scale-21: Depression subscale) ***  Social anxiety (Social Phobia Inventory) ***  GP visits (Single item: How many times have you been seen by a general practitioner?) *** | No significant improvement in depression:  There were no significant differences between the intervention and control group (β = 0.061, *SE* = 0.20, *p* = .76; time by condition interaction: β = -0.33, *SE* = 0.21, *p* = .12)    Significant improvement in social anxiety:  The intervention group reported an average decrease of −0.50 (*SE* = 0.12, *d* = −0.46) points and TAU group reported an average increase of 0.03 points (*SE* = 0.12, *d* = 0.03). There was a significant time by condition interaction (β = −0.53, *SE* = 0.17, *p* = .003).  Significant reduction in GP visits:  The intervention group experienced a −0.53 (*SE* = 0.24, *d* = - 0.33) decrease in GP visits and TAU group experienced a 0.49 (*SE* = 0.25, *d* = 0.30) increase in GP visits. There was a significant time by condition interaction (β = −0.75, *p* = .004) |
| Hogg et al., 2025 | Two active interventions  Supported socialisation:  Group based vs individual based intervention focusing on developing, maintaining, and strengthening social connections and group ties | Duration: 2 months  Follow-ups at 1 and 6 months | Wellbeing (Warwick-Edinburgh Mental Wellbeing Scale) *** | There were no significant differences in wellbeing between the two intervention formats (group vs individual format) |
| Johnson et al., 2019 | Interpersonal psychotherapy | Duration: 10 weeks  Follow-up at 3 months | Depression (17-item Hamilton Rating Scale for Depression) *  Suicidal thoughts (Beck Scale for Suicide Ideation) *** | There were significant differences in depression between the intervention and control group (*F* = 5.12, *p* = .03, *d* = -0.18)  There were no reported between group differences in suicidal ideation (*F* = 0.19, *p* = .66, *d* = - 0.12) |
| Joo et al., 2025 | Peer Enhanced Depression Care (PEERS): Peer support social engagement intervention | Duration: 8 weeks    Follow-ups at 3, 6, 9 and 12 months from baseline | Depression (9-item Patient Health Questionnaire) *  Emotional, social and physical functioning (Medical Outcomes Short Form) ***  Health service use (Cornell Service Index) *** | There were no significant group differences or group by time interactions found for depression (*F* (6,495) = 0.98, *p* = .44) or any of the other outcomes |
| Kahlon et al., 2023 | Lay-person delivered relational telephone intervention | Duration: 4 weeks | Depression (8-item Patient Health Questionnaire) **  Anxiety (7-item Generalised Anxiety Disorder Measure) ** | There was a significant time by group interaction for depression indicating the intervention reduced depression over time compared to the control group (Mean difference=1.3, 95% CI [0.1,2.5], *p* = .013)  There was no significant time by group interaction for anxiety (*p* = .154) |
| Karkosz et al., 2024 | Online agent-guided cognitive behavioural therapy delivered via chatbot | Duration: 2 weeks  Follow up at 1 month | Depression (20-item Centre for Epidemiologic Studies Depression Scale – Revised) *  Anxiety (20-item State-Trait Anxiety Inventory) *  Life satisfaction (5-item Satisfaction with Life Scale) * | There were no significant differences in depression (*F* (1,66) = 0.295, *p* =.589), anxiety (*F* (1,66) = 0.021, *p* =.886) and life satisfaction (*F* (1,66) = 1.698, *p*=.197) between the intervention and control group    There was no significant time by group interactions for any of the outcomes: depression (*F* (1,66) = 0.962, *p* =.330), anxiety (*F* (1,66) = 0.001, *p* =.971) and life satisfaction (*F* (1,66) = 0.002, *p* =.967) |
| Leung & Li, 2024 | Spiritual connectivity intervention | Duration: 8 weeks  Follow-up at 3-months and week 20 | Depression (9-item Patient Health Questionnaire) *  Anxiety (7-item General Anxiety Disorder) * | Depression scores were significantly lower in the intervention group compared to the control group post-intervention (*d* = −1.801; *p* < .001).  Anxiety scores were significantly lower in the intervention group compared to the control group post-intervention (*d* = −1.605; *p* < .001) |
| Liu et al., 2022 | App-based digital intervention focused on mindfulness and social support | Duration: 8 weeks | Depression (Edinburgh Post-natal Depression Scale) | There were significant between group differences and group by time interactions indicating that the intervention group experienced significant reduction in depressive symptoms compared to the control group (Main effect of Group: *F* (1,128) = 4.432, *p* = .04, η²ₚ  = .033; Group by time: *F* (1,128) = 12.216, *p* < .001, η²ₚ  = .087) |
| Lloyd-Evans et al., 2020 | Peer delivered supported socialisation programme | Duration: 6 months | Depression (9-item Patient Health Questionnaire) **  Anxiety (7-item Generalised Anxiety Disorder Measure) **  Quality of life (10-item Recovering Quality of Life Questionnaire) ** | There was no statistically significant difference between the intervention and control group on depression scores (- 2.54, 95% CI: [-6.53, 1.44], *p* = .20).  The intervention group showed a decrease in median anxiety scores from 19.0 (IQR= 15.0-21.0) to14.0 (IQR= 10.5-17.5). The control group showed a decrease in median anxiety scores from 16.0 (IQR=11.0-18.0) to 13.5 (IQR= 11.0-16.0)  The intervention group showed an increase in median quality of life scores from 9 (IQR= 4.0-14.0) to 14.5 (IQR= 8.0-19.0). The control group showed an increase in median quality of life scores from 9.5 (IQR=5.0-15.0) to 13.5 (IQR=10.0-19.0) |
| Moeini et al., 2019 | Web-based depression improvement programme based on cognitive behavioural therapy | Duration: 12 weeks  Follow-up at 24 weeks | Depressive symptoms (Center for Epidemiologic Studies Depression Scale) ** | The intervention group reported a statistically significant improvement in depressive symptoms post-intervention There were statistically significant differences in mean score of depression between the groups (*p* <.05) |
| Mueller & Cougle, 2023 | ‘Building Closer Friendships’ intervention:  Digital intervention focused on fear of intimacy in individuals with social anxiety disorder | Duration: 8 weeks  Follow-up at 1 month | Social anxiety symptoms (Social Phobia Inventory) **  General symptoms of anxiety (21-item State-Trait Inventory for Cognitive and Somatic Anxiety-Trait version) **  Depression (20-item Centre for Epidemiologic Studies Depression Scale) ** | The intervention group reported lower depression at one-month follow-up (β = .22, *p* = .04, *sr2* = 0.048), but not at post-treatment (β = 0.10, *p* = .30, *sr2* = 0.009), compared to the waitlist condition  There was no differences between the intervention and control group on social anxiety (β = 0.02, *p* = .84, *sr2* < 0.001) or general anxiety (β = −0.04, *p* = .56, *sr2* = 0.001) at post-treatment or one-month follow-up, (social anxiety: β = 0.15, *p* = .07, *sr2* = 0.025; general anxiety: β = 0.15, *p* = .07 *sr2* = 0.023) |
| Öztürk et al., 2025 | Equine assisted therapy | Duration: 8 weeks | Severity of schizophrenia symptoms (Positive and Negative Syndrome Scale) **  Quality of life (Quality of Life Scale for Schizophrenia) **  Anxiety (Trait Anxiety Inventory) ** | The intervention group showed a significant decrease in positive symptoms of schizophrenia compared to the control group (*p* = .013, 95% CI [-3.10, -0.39], *d* = 0.66). There was no statistically significant difference between the intervention and control group on overall severity of psychotic symptoms  Quality of life significantly improved in the intervention group compared to the control group *(p* < .001, 95% CI [19.26, 33.45], *d* = 1.93)  The intervention group showed a significant reduction in anxiety scores compared to the control group (*p* =.017, 95% CI [−12.02, −1.20], *d* = 0.63) |
| Perkins, Spiro & Waddel, 2023 | Online-based supportive socialisation songwriting intervention to promote social connectedness with other mothers | Duration: 6 weeks  Follow up at 4 weeks | Post-natal depression (Edinburgh Post-natal Depression Scale) *** | Post-natal depression scores were significantly lower in the intervention group compared to the control group over time (*F* (1.655, 96.569) = 12.231, *p* < .001, η²ₚ = .174) |
| Radin et al., 2023 | Two active intervention groups:  Caring contact: non-demanding and caring text messages    Caring contacts+: brief non-demanding and caring text messages and an introductory phone call | Duration: 6 months | Suicidality ideation (6-item Columbia Suicide Severity Rating Scale ***  Use of outpatient mental health services *** | There was a small significant difference between groups in suicidal ideation (Mean difference = 0.2, 95% CI [0.002, 0.5], *p* = .05)  There were no significant between group differences in use of mental health services |
| Rodriguez-Romero et al., 2021 | Community based intervention consisting of group-based activities | Duration: 6 months | Depression (Yesavage Abbreviated Questionnaire) ** | There were no statistically significant differences in depression between the intervention and control group (Mean difference = -2.73, 95% CI [-6.29, 0.82], *p* = .13) |
| Ruiz-Comellas et al., 2022 | Group based moderate intensity physical activity programme | Duration: 4 months  Follow-up at 12 months | Clinical remission in depression (Beck Depression Inventory) **  Clinical remission in anxiety (General Anxiety Disorder Scale) **  Quality of life (EuroQol Questionnaire) ** | The intervention group experienced greater improvement in depression (*p* = .05) and anxiety (*p* = .009) compared to the control group. Participants in the intervention group were 59% (95% CI [1.08, 2.33]) more likely to have remission from depression and 45% (95% CI [1.02, 2.07]) more likely to have remissions from anxiety compared to the control group  The intervention group experienced improvement in health status perceptions compared to the control group (*p* = .02) |
| Shorey et al., 2019 | Supported socialisation and peer support via technology-based peer-support intervention program | Duration: 4 weeks  Follow up at 1 month and 3 months post-partum | Postnatal depression (Edinburgh Post-natal Depression Scale (EPDS) and Patient Health Questionnaire (PHQ-9)) ***  Anxiety (State-Trait Anxiety Inventory) *** | Post-natal depression (EPDS):  At 1 month, groups did not differ significantly (*p* = .23), but a significant difference was reported at 3 months (*d* = - 2.11, *p* = .03). There was a significant group by time interaction (*d* = - 1.16, *p* = .004)  Postpartum Depression (PHQ-9): There were no significant between-group differences at 1 or 3 months (*ps* = .06-.11). However, there was a significant group by time interaction (*d* = - 1.00, *p* = .03)  There were no significant between-group differences in anxiety at 1 or 3 months (*ps* = .52-.07) but there was a significant group by time interaction (*d* = - 4.16, *p* = .03) |
| Smith et al., 2021 | Group-based cognitive behavioural therapy | Duration: 12 weeks  Follow up at 3-month post-treatment for CBT group only | Anxiety (20-item Geriatric Anxiety Inventory) **  Depression (30-item Geriatric Depression Scale) ** | The group by time interaction showed that mean anxiety disorder severity improved more in the intervention group than in the control group (*F* (1,49.603) = 17.858, *p* < .001, *d* = −0.89)    The group by time interaction showed that mean depressive disorder severity improved more in the intervention group than in the control group (*F* (1,45.451) = 30.884, *p* < .001, *d* = −1.35) |
| Soucy et al., 2019 | Two active intervention groups:  Behavioural activation  Physical activity | Duration: 8 weeks | Life satisfaction (5-item Satisfaction with Life Scale) *** | There were no significant between group differences or group by time differences in life satisfaction (Main effect: *F* (2, 74.62) = 7.86, *p* = .001; Interaction: *F* (4, 74.56) = 0.62, *p* = .65) |
| Swinkels et al., 2023 | Forensic network coaching: social skills support and supported socialisation | Duration: 12 months  Follow-up at 18 months | Mental wellbeing (Mental Health Continuum – Short Form) *  Duration and number of hospitalisations (Health of the Nations Outcome Scale) ***  Quality of life (Manchester Short Assessment of Quality of Life) *** | There were no significant differences in mental wellbeing between the intervention and control group over time (adjusted mean difference = - 0.193, 95% CI [-0.434, 0.047], *p* = .11)  There was a significant between group difference for duration of hospitalisation at 12 months (Rate Ratio = 0.483, 95% CI [0.252, 0.926], *p* = .03) and 14 months follow-up (Rate Ratio = 0.244, 95% CI [0.130, 0.455], *p* < .001)  There were no significant between group treatment effects found for quality of life |
| Syed, 2017 | Spiritual reminiscence therapy | Duration: 6 weeks  Follow-up at 3 months | Anxiety (30-item Geriatric Anxiety Scale) *  Depression (14-item Geriatric Depression Scale) * | There were no significant differences between the intervention and control group (*F* (1,32) = 1.38, *p* = .25) or group by time interaction (*F* (1,32) = 0.31, *p* = .74) in anxiety scores  There was no significant group difference between the intervention and control group (*F* = (1,32) = 0.69, *p* = .41) or group by time interaction (*F* (2,31) = 1.04, *p* = .37) in depression |
| Van Orden et al., 2021 | Psychotherapeutic social engagement intervention | Duration: approximately 10 weeks  Follow-up at 3-weeks, 6-weeks, and 10-weeks post-baseline | Depressive symptoms (16-item Quick Inventory of Depressive Symptomatology) ***  Suicidal ideation (Geriatric Suicide Ideation Scale – Screening version) ***  Social-emotional quality of life (World Health Organization Quality of Life Scale) *** | The intervention was associated with statistically significant improvements in depressive symptoms over time (χ2(3) = 15.05, *p* = .002), and with improvements in social-emotional quality of life (χ2(1) = 5.86, *p* = .015) but was not associated with decreases in suicidal ideation (χ2(3) = 1.31, *p* = .726) |
| Vogel et al., 2023 | Eating club intervention: home-based skills training sessions and nurse guided peer support group sessions | Duration: 8 months  Follow up at 12 months | Personal recovery (24-item Recovery Assessment Scale) *  Psychotic symptoms (Community Assessment of Psychic Experiences) *** | There were no significant between group differences found for personal recovery outcomes post-intervention (*B* = 0.08, *SE* = 0.11, 95% CI [-0.14, 0.29], *p* = .48)  There was no significant group difference between the intervention and control group in i) positive psychotic symptoms (end of treatment: *B* = -1.23, *SE* = 1.94, 95% CI [- 5.12, 2.64], *p* = .53; follow-up: *B* = 2.58, *SE* = 2.06, 95% CI [-1.52, 6.69], *p* = .21) or ii) negative psychotic symptoms (end of treatment: *B* = 2.72, *SE* = 1.59, 95% CI [- 0.45, 5.88], *p* = .09; follow-up: *B* = 0.18, *SE* = 1.68, 95% CI [- 3.16, 3.53], *p* = .91) |
| Zhang et al., 2024 | Individual counselling and psychoeducation (e.g. coping skills, cognitive restructuring techniques) | Duration: 3 months  Follow up at 1 year | Anxiety (Self-rating Anxiety Scale) **  Depression (Self-rating Depression Scale) ** | There were significant between group differences indicating that the intervention group experienced greater reduction in anxiety (*F*=5.31, *p* =.006) and depression (*F*=9.17, *p* < .001) at all time points |

*primary outcome

**one of the main outcomes, primary outcome not specified

*** secondary outcomes

a Felton et al (2019) conducted a secondary analysis of data from a larger RCT included in this review (Johnson et al., 2019)

# **Appendix 6: Characteristics of interventions**

Table 1. Characteristics of interventions evaluated in included studies and their mechanism of change (*n*=40)

| Author | Intervention and control group | Intervention format, duration and number of sessions | Intervention description | Mechanism of change (if applicable and clearly described by authors) | Characteristics of intervention providers | Lived experience input |
| --- | --- | --- | --- | --- | --- | --- |
| Alvarez-Jimenez et al., 2021 | Horyzons peer support and online interactive therapy programme vs. Treatment as usual (primary and tertiary mental health services) | Open-ended online platform  Duration: 18 months | A moderated online social therapy intervention integrating interactive online therapy, peer to peer online social networking, and expert support. Themes covered include psychoeducation on psychosis, relapse prevention, fostering vocational skills, promoting positive social connections, managing anxiety and depression, and problem solving. | The intervention aimed to promote social support and social recovery through encouraging participants to communicate with each other using the online social network platform to form positive social connections. | The intervention was developed by a multidisciplinary team and involved young people with lived experience of mental illness. The intervention was supported by clinicians, social workers, and vocational workers. | The intervention was co-developed with lived experience experts |
| Amin et al., 2020 | Support for Students Exposured to Trauma vs No treatment control | Face-to-face group intervention  10 sessions for 45 minutes  Duration: 12 weeks | School-based intervention consisting of psychoeducation, cognitive restructuring, relaxation, behavioural exposure, and social problem solving. Through these activities, the aims are to: i) help people form attachments and maintain social relationships that promote resilience, and ii) reduce PTSD symptoms. | N/A | The intervention was led by a clinically trained practitioner. Teachers volunteered as co-facilitators and received training on the intervention content and their supportive roles. All facilitators had master's level qualification in education. | N/A |
| Ayar & Sabancioğullari, 2022 | Solution-oriented therapy vs. Routine nursing care | Face-to-face (assumed), individual based intervention  6-10 sessions for 40 minutes  Duration: 20 days | The solution-therapy programme is a consultative strength-based intervention focused on using an individual’s strengths and abilities to create solutions for problems.  Techniques used include establishing positive goals, miracle questions, planning a road map, and designing mental maps for recognising resources and solutions. | Through reducing interpersonal issues, the intervention may lead to the development of and improvements in social relationships which may indirectly enhance social support. | The researcher who designed the intervention has received theoretical/practical training and supervision about solution-oriented therapy.  Solution focused therapists were consulted and provided feedback in the development of the intervention. | N/A |
| Birkeland et al., 2020 | Trauma focused cognitive behavioural therapy vs Treatment as usual (therapist picked a suitable intervention for each child) | Face-to-face individual based therapy (assumed)  12-15 sessions | The intervention involved: i) psychoeducation, ii) parental skills, iii) relaxation skills, iv) affective modulation skills, v) cognitive coping skills, vi) cognitive processing of traumatic event, and vii) in-vivo mastery of trauma reminders.  The intervention consisted of conjoint child-parent sessions, individual therapy with the child, and individual therapy with the parent. | The treatment aimed to enhance parental support and parental ability to help the child. This then would lead to improvements in the child’s perceived social support. | The treatment was led by clinicians | N/A |
| Bourassa et al., 2020 | Prolonged exposure therapy (either with or without virtual reality) vs. Minimal attention waitlist control | Face-to-face (assumed), individual based intervention  Ten 90–120-minute sessions  Duration: minimum of 5 weeks | Prolonged exposure is a manualised treatment for posttraumatic stress disorder that involves: i) psychoeducation on PTSD and common responses to traumatic events, ii) breathing retraining, iii) repeated and prolonged imaginal exposure to the traumatic memory, iv) cognitive and emotional processing of traumatic material that emerged in the exposure, and v) in vivo exposure to safe but feared situations that are avoided. It is postulated that the intervention might improve social support and that social support would predict improvement in PTSD symptoms.  The virtual reality assisted prolonged exposure varied from traditional prolonged exposure in that virtual reality exposures to the trauma memory were used in place of traditional imaginal exposures. | N/A | Therapists were five doctoral level clinicians trained in clinical psychology. All were trained in prolonged exposure and virtual reality exposure techniques.    Therapists treated a minimum of two videotaped practice patients with supervision before treating study participants. Weekly supervision was provided by experienced exposure therapy clinicians. | N/A |
| Boyd et al., 2017 | Parenting intervention plus psychoeducation vs. A waitlist control group | Face-to-face group-based intervention  12 sessions  Duration:12 weeks | A parenting program that aims to improve parenting, parent-child interactions, and social competence. Topics covered include praising and encouraging children, social and emotional coaching, identifying social support networks and addressing barriers to social support, forming social support goals, and positive discipline.  A psychoeducation component was incorporated focused on improving family members’ understanding of depressive disorders and its impact on children. | N/A | Group leaders had master's or doctoral graduate degrees in psychology. They completed a weekly checklist to ensure that key aspects of the program were implemented with fidelity | N/A |
| Conley et al., 2024 | Interpersonal psychotherapy and psychoeducation vs. Referral to usual care | Face-to-face group-based sessions or videoconferencing if the participants is ill with COVID-19  One 45-60-minute individual session and eight weekly 90-minute group sessions  Duration: 11 weeks | Interpersonal psychotherapy intervention focused on i) relationships and understanding the functioning and impact of relationships, ii) psychoeducation on depression and coping skills such as mobilising social support, and iii) implementing interpersonal skills.  A pre-group initial evaluation session was held with participants to evaluate symptoms and functioning, set goals, and introduce interpersonal psychotherapy. | The intervention aims to build interpersonal- emotional skills using techniques including affective awareness and expression, communication analysis, decision analysis, and role playing. These skills would help individuals mobilise social support, improve communication and conflict resolution skills, and build and maintain satisfying social connections thereby mitigating social isolation. | Four clinicians delivered the intervention including a clinical psychologist trained in interpersonal psychotherapy, and three clinical psychology doctoral students who completed training and received supervision during the trial | N/A |
| Cruwys et al., 2021 | Groups 4 Health (G4H) vs. Dose-controlled manualised group-based CBT for depression: the Blues Program | Face-to-face, clinician-led, group-based intervention    4 weekly 75-minute sessions, a further session 1 month following the end of the intervention.  Duration: 8 weeks | G4H is a psychotherapeutic programme that aims to reduce loneliness by building group-based belonging. Session content included psychoeducation, developing a social identity map to identify current social connections, developing goals for engaging in existing groups and joining new groups. | Following social identity theory, G4H seeks to increase group-based belonging using a combination of educational, psychotherapeutic and behavioural strategies, in order to build a positive social identity, group belongingness, and reduce loneliness. | Group facilitators were provisional psychologists completing a professional psychology graduate programme, and were provided with focused training to deliver the G4H intervention | N/A |
| Campbell et al., 2019 | Behavioural activation (BA) psychotherapy vs. Treatment as usual (alternative psychotherapy and pharmacology) | Face-to-face individual based psychotherapy  Up to eight 45- to 60-minute sessions    Duration: not specified | The intervention involved psychoeducation, behavioural analysis of avoidance, activity scheduling, mood monitoring, and mindfulness to reduce avoidance behaviours and increase engagement in valued activities. | BA may increase social support via an increase in engagement in a variety of social activities which may reduce isolative and solitary behavior | BA was delivered by three doctoral-level psychologists: the trial’s two principal investigators and a provider who was trained and supervised by the principal investigators. | N/A |
| Dol et al., 2025 | Standardised evidence-based SMS text messaging intervention vs Treatment as usual | Digital mobile intervention  Daily messages on weeks 3 to 6 or twice-daily messages on weeks 1 to 2  Duration: 6 weeks | Evidence-based SMS text messages that provide information related to newborn care and maternal mental health in the first 6-week postpartum. Information is personalised based on infant age and woman’s self-selected preference for breastfeeding or formula feeding. All messages were developed using social cognitive theory and focused on social support and interactions. | N/A | N/A | N/A |
| a Felton et al., 2019 | Interpersonal psychotherapy (IPT) vs. Treatment as usual (referrals to existing mental health resources e.g. psychotropic medication & limited psychosocial treatments) | Face-to-face group intervention  Four individual sessions to prepare participants  Twenty 90-minute sessions and four individual sessions  Duration: 10 weeks, followed by the final individual session four weeks later | IPT centers on helping individuals to identify specific interpersonal stressors in their lives and to build interpersonal skills to address the distress associated with these stressors. Interpersonal skills included communication, changing expectations about relationships, and fostering a supportive social network. | IPT focuses on helping individuals build interpersonal skills including ways to foster a supportive social network. This would then improve social interactions and strengthen important relationships and enhance social support. | Nine therapists employed within the prison delivered IPT. All therapists had a bachelor’s degree and at least one year of experience working with incarcerated populations, and received training and supervision from a certified IPT supervisor. | N/A |
| Haslam et al., 2019 | Groups 4 Health (G4H) vs Treatment as usual | Face-to-face group intervention  Four weekly 60- to 90-minute sessions, and a further session one month following the end of the intervention  Duration: 2 months | Structured, manualised group-based intervention involving five clinician-led modules with associated workbooks containing exercises/activities. The intervention involved education on the importance of social connectedness, social network mapping to identify current social networks, and developing plans for engaging in social groups and joining new groups. | The intervention aims to reduce loneliness through: i) development and maintenance of positive social group relationships using psychoeducation and social network mapping, and ii) enhancing existing social relationships and overcoming barriers with the goal of strengthening one’s sense of social identity and improving psychological belongingness. | Intervention was delivered by two provisionally registered psychologists, trained in programme delivery and received weekly group supervision. | N/A |
| Hogg et al., 2025 | Groups for Health (G4H) intervention adapted for individuals with psychosis vs. Individual-based group-format G4H | Face-to-face either individual or group-based formats  Five hourly sessions plus one additional informal check-in  Duration: 2 months | Structured, manualised group-based intervention.  Five clinician-led modules focused on psychoeducation on social groups, identifying and mapping social networks, and identifying resources available from social groups. Participants make individualised plans to nurture existing social connections, reconnect, or join new social groups.  Workbook activities, adapted for people with psychosis | The intervention intends to support people to develop and maintain positive social relationships and promote a positive social identity and improve group belongingness which should then improve social connectedness thereby reducing loneliness. | First author (an experienced clinical psychologist) and a lived experience researcher. | Adaptations to the G4H intervention were co-developed with a lived experience advisory panel comprising of 8 people with psychosis. Group sessions were co-delivered with a lived experience researcher. |
| Johnson et al., 2019 | Group based interpersonal psychotherapy (IPT) vs Treatment as usual (any treatment available) | Group based intervention  Twenty 90-minute sessions one day per week  Four individual sessions to prepare participants  Duration: 10 weeks | The intervention involved addressing interpersonal issues and patterns using a positive goal-oriented, present focused approach and utilising techniques such as acceptance and empathy. Interpersonal skills included communication, changing expectations about relationships, and fostering a supportive social network. | IPT focuses on helping individuals build interpersonal skills including ways to foster a supportive social network. This would then improve social interactions and strengthen important relationships and enhance social support. | Five master level prison mental health clinicians and four nonmental health workers (e.g. public health specialists). Experienced interpersonal psychotherapists provided training and supervision. | N/A |
| Joo et al., 2025 | Peer Enhanced Depression Care (PEERS) vs. Social interaction control group | Individual based digital intervention  8 weekly, 60-minute telephone meetings    Duration: 8 weeks | The intervention focused on the provision of social support, coping skills, behavior change, and connection to community-based and clinical services. There were three core components: 1) relationship building and active listening, 2) goal setting and using the experiential knowledge shared by the peer mentor (e.g. coping skills), and 3) engagement with the community | N/A | Peer mentors delivering the intervention were aged 50 or above, had a history of depression, and had previous work or volunteer experiences in mental health services. Mentors were trained by geriatric psychologists, social workers, and research coordinators and received weekly supervision. | N/A |
| Kahlon et al., 2023 | Lay-person telephone delivered intervention vs Control group receiving assessment calls only | Individual based telephone intervention  One call per weekday for first week with option to reduce to two or three for weeks 2-4  Duration: 4 weeks | An empathetic relational-focused telephone intervention delivered by lay people to reduce loneliness. The caller practices active listening and displays empathy and curiosity with a goal of learning as much as they could about the person they were calling. | N/A | The study included 16 non-professional callers aged 17-23. Volunteer callers received two hours of training including a 15-minute role play video. | NA |
| Karkosz et al., 2024 | Online agent-guided cognitive behavioural therapy (CBT) vs Self-help CBT book | A Polish-language therapy-supporting chatbot (integrated into Facebook Messenger)    Duration: 2 weeks  Participants free to use the chatbot as often as desired. | The intervention used an online agent-guided chatbot (“Fido”) that delivered CBT-based responses, including psychoeducational material about depression, Socratic questioning to address cognitive distortions, the ABC techniques (Activating event, Belief, Consequence), gratitude exercises, and mood management prompts.  The theory behind how loneliness would be reduced was not explained. | N/A | Fully automated chatbot (no human therapists involved). | N/A |
| Laurila et al., 2024 | Solution-focused therapy (SFT) vs. Short psychodynamic psychotherapy (SPP) vs Long-term psychodynamic therapy (LLP) | Face-to-face, individual based interventions  SFT: 12 sessions once in two to three weeks  SPP: 20 sessions once a week  LPP: Two to three weekly sessions up to a maximum of three weeks | SFT is a goal-focused and brief intervention aimed at identifying problems and finding solutions using an individual’s own resources. The intervention included home assignments and positive feedback.  SPP is brief, transference-based therapy approach focused on working on intrapsychic and interpersonal conflict.  LPP is an open ended, transference-based approach, focused on current and past intrapsychic and interpersonal conflict. | N/A | Six therapists provided SFT  12 therapists provided SPP  41 therapists provided LPP | N/A |
| Leung & Li, 2024 | Spiritual connectivity intervention vs. Waitlist control group | Face-to-face (assumed), group-based intervention with a mobile-app component.  8 sessions  Duration: 8 weeks | The intervention combines principles from i) CBT including cognitive reframing and behavioural activation, ii) positive psychology (e.g. skills to foster gratitude and presence, forgiveness), and iii) elements of spirituality and religiosity (e.g. prayer, meditation). The spiritual component aims at promoting a sense of connection with everything including others. | N/A | N/A | N/A |
| Liu et al., 2022 | Mindfulness and social support app-based intervention (We’ll App) vs. Waiting control | Digital mobile app-based intervention  Duration: 8 weeks | The We’ll App is a mindfulness and perceived social support interventions, with two main goals: i) to provide guidance for puerperae on mindfulness techniques and ii) provide perceived social support for puerperae. The app included a social networking function to promote support. | N/A | N/A | N/A |
| Lloyd-Evans et al., 2020 | Community navigator study vs treatment as usual (standard mental health care) | Face-to-face 10-hour long individual meetings and 3 group meetings  Duration: 6 months | The intervention involved: i) social network mapping used to identify interests, social activities and relationships, and strengthen existing relationships, ii) development of a connection plan to identify goals to increase social connections, and iii) group sessions for participants to meet each other, initiate friendships, and share experiences. | N/A | The intervention was co-produced by experts by lived experience, practitioners and researchers. Community navigators were selected on the basis of excellent interpersonal skills, awareness through personal or work experience of the challenges faced by people with serious mental illness, knowledge of their local community resources and previous work experience of supporting social inclusion and helping people develop social connections. Community navigators received training covering topics on: social network mapping, solution focused approaches, how to deal with risk, and adoption of strength-based approaches for 5 days | The intervention was co-developed and produced by members with lived experience. |
| Moeini et al., 2019 | Web-based depression improvement program based on CBT principles vs Control group (no information) | Web-based, online intervention (short videos, animations and PowerPoint slides)  Two 30-minute sessions per week for a total of 8 sessions  Duration: Unclear | The intervention, based on social cognitive theory, involved seven core modules to help participants identify and reconstruct unproductive beliefs into reasonable and beneficial beliefs. Participants had access to online assistance from a psychiatrist. Text message reminders were sent to the participants via Telegram. | The intervention involved a social support module that involved video chats with psychiatrists and emotional support provided by other participants via the Telegram group formed, which may improve perceived social support. | The intervention involved psychiatrists | N/A |
| Mueller & Cougle, 2023 | Technology-based intervention targeting fear of intimacy (BCF) vs. Waitlist control | Technology-based intervention with two in-person sessions  Four sessions with additional exercises  Duration: 4 weeks | The BCF intervention consisted of three components: an emotional writing component, a social skills learning component, and a final exposure exercise. The purpose is to increase vulnerability in conversations and to build skill and comfort with expressing thoughts and emotions with others. | The intervention reduces loneliness through targeting fears of intimacy to increase closeness of relationships formed by teaching skills on effectively sharing one’s thoughts and emotions. | The conversation task, which was administered only at post-treatment, consisted of a short 10-min conversation with a research assistant acting as a confederate. | N/A |
| O’Day et al., 2021 | Two active intervention groups:  Cognitive-behavioural group therapy (CBGT), and mindfulness-based stress reduction (MBSR) vs Waitlist control group | Intervention 1: CBGT  Face-to-face (assumed) group-based intervention  Intervention 2: MBSR  Face-to-face (assumed) group-based intervention  Twelve 2.5 hour weekly sessions  Duration: 12 weeks | Intervention 1: CBGT  Intervention involved: i) psychoeducation about CBT and social anxiety disorder, ii) learning cognitive restructuring skills to identify and challenge negative, automatic thoughts, iii) in-vivo exposures to feared situations and (iv) relapse prevention.  Intervention 2: MBSR  Treatment emphasises use of mindfulness and acceptance strategies to notice and non-judgmentally accept anxious thoughts, feelings and behavior. Mindfulness workbook used during sessions and at home. | CBGT targets negative thoughts and social anxiety by learning cognitive restructuring techniques to challenge unhelpful thoughts and in-vivo exposure to face feared situations. This may reduce maladaptive social cognitions and reduce avoidance which would then reduce loneliness.  MBSR focused on mindfulness and acceptance strategies which could help participants to non-judgmentally notice and examine unhelpful social cognitions which could reduce loneliness. | Intervention 1: CBGT  Intervention administered by PhD-level psychologists trained to implement CBGT for social anxiety disorder.  Intervention 2: MBSR  Intervention administered by a master’s level certified MBSR instructor. | N/A |
| Öztürk et al., 2025 | Equine assisted therapy programme vs Treatment as usual (community mental health services) | Individual based intervention  Two 40-minute sessions per week  Duration: 8 weeks | The intervention involved 20-minute horseback riding and 20 minutes of activities (e.g. feeding, petting). | Equine assisted therapy can help people establish connections with different beings, foster friendships, and improve social skills. The increase in social interaction can strengthen social bonds which then reduces loneliness. | The programme was designed and delivered by psychiatrists, psychiatric nurses, equine trainers, and physiotherapists | N/A |
| Perkins, Spiro & Waddel, 2023 | Online songwriting intervention vs Waitlist control group | Online group-based intervention  Weekly 60 minutes online sessions via Zoom for 6 weeks | The intervention involved songwriting composition through discussion of ideas, creating melodies, and group singing, with opportunities for group discussion and sharing of stories. The aim was to enhance social connections among women with post-natal depression. | N/A | Two professional musical leaders and research assistants. | Fourteen mothers experiencing loneliness and post-natal depression participated in two online focus groups to inform the development and structure of the intervention. |
| Radin et al., 2023 | Two active intervention groups:  Caring contacts (CC): caring text messages vs. Caring contacts+ (CC+): caring text messages and introductory phone call | Digital individual-based text messaging programme  Weekly texts send for the first 4 weeks, then week 6,8,10,12,16, 20 and 24  Duration: 6 months | Standardised caring and non-demanding text messages. Replies were individualised unscripted caring replies. Through these caring texts, participants would feel less lonely. | N/A | Two non-clinical specialists at a suicide hotline were trained and sent text messages. The research team included people with lived experience, physicians, researchers, psychologists and social workers. | The content of the texts was developed in consultation with people with lived experience of suicidality |
| Rodriguez-Romero et al., 2021 | Community based intervention vs Treatment as usual | Face-to-face group-based intervention  18 sessions  Duration: 6 months | Intervention consisted of i) health promotion, ii) activities to improve emotional and mental state (e.g. yoga), and iii) activities to promote social connections (e.g. trips to cinema). | The intervention aimed to empower participants and promote use of community resources which would then reduce loneliness. | The intervention was led by nurses, family physicians, social workers, and neighborhood community agents. | N/A |
| Ruiz-Comellas et al., 2022 | Physical activity programme vs Treatment as usual | Face-to-face group-based intervention  Two days per week  Duration: 4 months | Moderate aerobic physical activity with health workers guiding the pace of the walk and distance depending on participants’ capacity. The goal was to foster social relationships between group members and enjoy outdoor activities. A WhatsApp group was created to encourage and praise participants and share photos. | N/A | The physical activity intervention was led by health workers. | N/A |
| Russinova et al., 2023 | Community integration intervention vs Treatment as usual | Face-to-face (mix of group work and individual sessions)  12 weekly 2-hour group sessions and weekly individual support sessions  Duration: 12 weeks | The intervention involved: i) psychoeducation about community participation, ii) setting meaningful community participation goals, iii) community mapping to promote awareness and engagement in resources specific to participant goals, and iv) individual support sessions. Group discussions involved topics such as discrimination and barriers to community participation. | N/A | The intervention was delivered by teams of 3-4 peer support specialists. | The intervention was co-developed with a team of peer experts and specialists. |
| Seo et al., 2022 | CBT-based self-management mobile app. vs. a Control group receiving an information leaflet about postpartum depression | Mobile application self-guided intervention    Duration: 8 weeks | CBT-based mobile application consisting of psychoeducation, mood and thought management, activity scheduling to increase engagement in pleasant activities, facilitation of help-seeking behaviour, and a bulletin board for communication with others. | The intervention improved social support through strengthening and encouraging partner and family awareness of participant’s needs, enhancing access to community resources, encouraging engagement and connections with peers, and encouraging help-seeking behaviours. | N/A | N/A |
| Shorey et al., 2019 | Technology-based peer-support vs. Standard postnatal hospital care | Digital based one-to-one peer support (via phone/text/email)    At least one session per week with additional support as needed  Duration: 4 weeks | The peer-support intervention program paired at-risk postpartum mothers with trained peer volunteers (recovered mothers). Sessions were individualised, and focused on sharing postpartum experiences, and ways of seeking family support, and sharing feelings with partners. | N/A | Peer volunteers delivering the interventions were mothers who had lived experience of postnatal depression.    Trained and supervised by a psychiatrist.    Delivered intervention remotely, with flexibility in contact type and frequency. | The intervention was delivered by mothers with lived experience of post-natal depression, specifically recruited and trained for the study. |
| Short et al., 2019 | Psychoeducation combined with cognitive bias modification vs Repeated contact control | Digital individual-based intervention  Duration: 3 weeks | A computerised programme focusing on cognitive re-structuring of common myths contributing to perceived burdensomeness and thwarted belongingness (e.g. No one wants me around). The psychoeducation components included education about depression and social interaction, and cognitive and behavioural coping techniques. | The intervention targeted unhelpful myths surrounding thwarted belongingness through cognitive modification of unhelpful cognitions and psychoeducation on coping skills to correct problematic beliefs about thwarted belongingness. | Primary researcher and doctoral students with experience treating people with depression developed the intervention. The intervention itself was computerised. | N/A |
| Smith et al., 2021 | Group based CBT programme vs. No-contact waitlist | Face to face group intervention  12 two-hour weekly sessions  Duration: 12 weeks | Manualised CBT program including psychoeducation about anxiety and depression, behavioural activation, cognitive restructuring, problem solving, graded exposure, assertiveness training, sleep strategies, strategies to cope with loss and bereavement, and relapse prevention.  One session involved psychoeducation about loneliness and cognitive restructuring skills to address maladaptive thoughts associated with loneliness. | The intervention aims to change underlying mechanisms that cause and maintain loneliness through i) cognitive restructuring skills taught to address unhelpful cognitions associated with loneliness, ii) activity scheduling to encourage social activities and increase social contact and iii) graded exposure to social fears to reduce avoidance of social situations and reduced perception of social threats (e.g. fears of rejection). | The intervention was delivered by clinical psychologists or supervised graduate psychology students. | N/A |
| Soucy et al., 2019 | Two active intervention groups: Behavioural activation vs Physical activity vs. A wait-list control group | Individual-based self-directed intervention  The researcher provided bi-weekly brief phone-based support  Duration: 8 weeks | Behavioural activation intervention aimed at re-engaging individuals in activities that are meaningful and enjoyable.  Physical activity programme aimed at increasing intensity and frequency of physical activity. | Reactivation interventions may reduce loneliness and social withdrawal by encouraging social activities and increasing the social benefits gained from physical activity which may then improve mental health. | The intervention was led by the study author and a doctoral student in clinical psychology. | N/A |
| Swinkels et al., 2023 | Forensic network coaching plus standard forensic psychiatric outpatient care vs Standard care | Individual based intervention  Few hours, every 14 days  Duration: 12 months | The intervention involved volunteers forming healthy working alliances with participants, developing goals related to social networking using a structured tool, and coaching participants on social networking.  The relationships with the forensic network coach acts as a role model stimulating participants to strengthen their social network. | N/A | The intervention was delivered by non-professional volunteers who received training including a 3-hour practical on the use of a goal-oriented social network protocol, 9-hour training in basic coaching skills and a 2-hour training on forensic mental healthcare.Volunteers were supervised by the study coordinator. | N/A |
| Syed, 2017 | Spiritual reminiscence therapy vs Attention control group | Face-to-face group-based intervention  One 60–90-minute session per week  Duration: 6 weeks | The intervention involved revisiting memories relevant to themes of each session (e.g. life meaning), sharing experiences and stories with others within a supportive therapeutic enviournment and learning skills to cope with negative memories. This intervention was tailored to the Malaysian population by incorporating spiritual practices. | Spiritual reminiscence therapy based on social identity theory aims to reduce loneliness through promoting a sense of self-identify, shared social identity, group identification and belonginess. Through sharing memories and spiritual practices, participants might then feel connected to the group. | The intervention was led by the primary researcher who was the facilitator for the programme. | N/A |
| Van Orden et al., 2021 | Social engagement intervention (S-ENG) vs. Care-as-usual (CAU) | Face-to-face in-home individual sessions  Up to 10 sessions  Duration: approximately 10 weeks | The intervention involved i) behavioural psychotherapy to encourage participants to re-engage with pleasant physical and social activities they may have stopped doing due to depression and ii) address barriers contributing to loneliness (e.g. feeling like a burden) Psychoeducational materials were incorporated to address the importance of social connection. | S-ENG coaches aimed to encourage people to re-engage in meaningful social activities by creating tailored action plans and addressing any barriers to implementing the action plans (e.g. negative thoughts). This would increase rewarding social activities and social engagement thus addressing perceived disconnection (low belonging and perceived burden on others). | The intervention involved clinical psychologists and master’s level social workers. Weekly supervision was provided by the S-ENG intervention developer. | N/A |
| Vogel et al., 2023 | Nurse guided peer support eating club combined with individual skills training vs Waitlist control group (receiving treatment as usual) | Face-to-face, 15 bi-weekly sessions consisting of:    30–120-minute home-based skills training    120 minutes of guided peer support sessions in groups of three    Total duration: 8 months | The intervention involved: i) assessment of goals with a focus on social skills, ii) organised peer support groups where participants prepare dinner, and iii) home based skills training | Through peer-to-peer social contact, the intervention is expected to reduce loneliness and improve social skills | The intervention was guided by nurses. Nurses received one-day training provided by guided peer support experts, and six individual supervisory meetings with a trained psychologist. | N/A |
| Zhang, 2024 | Comprehensive psychological support vs Supportive resources (pamphlets and brief education) | Mixed intervention (individual and group-based)  Two 60-minute sessions every month  Duration: 3 months | Individuals were provided with individual psychological counselling, nursing and group mental health interactive sessions/lectures, and guidance on coping skills and cognitive reconstruction. Comprehensive psychological treatment and councelling aimed to improve anxiety and depression and alleviate loneliness. | N/A | Intervention delivered by psychotherapists, counsellors and nursing specialists | N/A |

a Felton et al (2019) conducted a secondary analysis of data from a larger RCT included in this review (Johnson et al., 2019)

N/A
