# Supplementary material
Source: Research Square preprint supplement (doi:10.21203/rs.3.rs-9576879/v1)
Supplement: Supplementary file 2 [file 58d96c5661a4591f2bc9cecd.docx]

**Additional File 5: Quality assessments**

Table 1. *Risk of bias in included studies (n=40)*

| **Paper** | **Domain 1: Randomisation process** | **Domain 2: Deviations from intended interventions** | **Domain 3: Missing outcome** | **Domain 4: Measurement of outcome** | **Domain 5: Selection of reported results** | **Overall Risk of Bias** |
| --- | --- | --- | --- | --- | --- | --- |
| Alvarez‐Jimenez et al., 2021 | Low | Low | Some concerns | Low | Low | Some concerns |
| Amin et al., 2020 | Low | Low | Some concerns | Low | Some concerns | Some concerns |
| Ayar & Sabancioğullari, 2022 | Some concerns | Low | Low | High | Some concerns | High |
| Birkeland et al., 2020 | Some concerns | Low | Low | High | Some concerns | High |
| Bourassa et al., 2020 | Some concerns | Low | Low | High | Some concerns | High |
| Boyd et al., 2017 | Low | Low | High | High | Low | High |
| Campbell et al., 2019 | Some concerns | High | Some concerns | Low | Some concerns | High |
| Conley et al., 2024 | Some concerns | Low | Low | High | Some concerns | High |
| Cruwys et al., 2022 | Low | Low | Low | Low | Some concerns | Some concerns |
| Dol et al., 2025 | Some concerns | Some concerns | Low | High | Low | High |
| Felton et al., 2020 | Low | Some concerns | Low | Low | Some concerns | Some concerns |
| Haslam et al., 2019 | Low | Some concerns | High | High | High | High |
| Hogg et al., 2025 | Low | High | Some concerns | High | Some concerns | High |
| Joo et al., 2025 | Some concerns | Some concerns | Some concerns | Some concerns | Low | Some concerns |
| Johnson et al., 2019 | Some concerns | Low | Low | Low | Low | Some concerns |
| Kahlon et al., 2023 | Low | Some concerns | Low | Low | High | High |
| Karkosz et al., 2024 | Some concerns | High | High | High | Low | High |
| Laurilia et al., 2024 | High | Some concerns | High | High | Some concerns | High |
| Leung & Li, 2024 | Low | Some concerns | Low | Low | Some concerns | Some concerns |
| Liu et al., 2022 | Some concerns | Low | Low | Low | Some concerns | Some concerns |
| Lloyd-Evans et al., 2020 | Low | Low | Low | High | Low | High |
| Moeini et al., 2019 | Some concerns | Low | High | High | Some concerns | High |
| Mueller et al., 2023 | Some concerns | Low | Low | High | Some concerns | High |
| Öztürk et al., 2024 | Low | Low | High | High | Some concerns | High |
| O’Day et al., 2021 | Some concerns | Low | Low | High | Some concerns | High |
| Perkins, Spiro & Waddel, 2023 | Low | Some concerns | High | High | Some concerns | High |
| Radin et al., 2023 | Low | Some concerns | Low | Some concerns | Low | Some concerns |
| Ruiz-Comellas et al., 2022 | Some concerns | Low | High | Low | Low | High |
| Rodríguez‐Romero et al., 2021 | Some concerns | Some concerns | Low | High | Some concerns | High |
| Russinova et al., 2023 | Some concerns | Low | High | High | Some concerns | High |
| Seo et al., 2022 | Low | High | High | Low | Some concerns | High |
| Short et al., 2019 | Some concerns | Low | High | High | Some concerns | High |
| Shorey et al., 2019 | Low | Low | Low | High | Low | High |
| Smith et al., 2021 | Some concerns | Low | Some concerns | High | Some concerns | High |
| Soucy et al., 2019 | Low | High | Some concerns | Some concerns | Some concerns | High |
| Swinkels et al, 2023 | Low | Low | Low | High | Low | High |
| Syed et al., 2017 | High | High | Low | High | Some concerns | High |
| Van Orden et al., 2021 | Some concerns | Low | Low | Some concerns | Low | Some concerns |
| Vogel et al., 2023 | Low | High | Low | High | Low | High |
| Zhang et al., 2024 | Some concerns | Some concerns | High | Some concerns | High | High |
