# Supplementary material
Source: Research Square preprint supplement (doi:10.21203/rs.3.rs-9576879/v1)
Supplement: Supplementary file 4 [file e6d6fa6993c693549ca1cb42.docx]

## **Additional File 3: Appendix 3**

## **Summary tables of study characteristics grouped by mental health conditions**

Table 1. Summary of characteristics of trials assessing loneliness or/and perceived social support as an outcome of interest among people with depression (n=10)

| Author    Study setting    Type of sample | Sample characteristics | Intervention  type | Comparator group | Loneliness/  perceived social support measure | Summary of findings: Effectiveness of the intervention | Quality ratings |
| --- | --- | --- | --- | --- | --- | --- |
| **Loneliness** | | | | | |  |
| **Individual-based interventions** | | | | | |  |
| Soucy et al., 2019**    Community sample recruited via newspaper, radio, interventions, university distribution list, and posters    Quebec, Canada | 59 adults with mild to moderate depressive symptoms    Mean age: 32.49  Age range: 20-62    Females: 73% | Two active interventions:    Behavioural activation (BA)    Physical activity (PA) | Wait-list control group | 20-item French version of the UCLA Loneliness Scale | No significant group by time differences between interventions and the control group at end of treatment (*F* (4, 71.27) = 0.181, *p* = .947) | High concerns |
| Van Orden et al., 2021**  Primary care clinics and an outpatient geriatric psychiatry clinic  USA | 62 adults aged 60 years and above who reported feeling lonely or like a burden and at risk of suicide  63% had mild to severe symptoms of depression  Mean age: 72 years (SD= 9.07)  Females: 68% | Psychotherapeutic social engagement intervention | Care-as-usual | Thwarted Belongingness subscale from the Interpersonal Needs Questionnaire | No significant differences in belongingness between groups were observed at any timepoint (group by time interaction: χ2(3) = 4.91, *p* = .178) | Some concerns |
| **Online/Digital interventions** | | | | | |  |
| Joo et al., 2025**    Community-based aging and social service and a geriatric primary care clinic    Northeast USA | 149 community-dwelling socially disadvantaged older adults with depressive symptoms    Median age = 69.5  Age range: 51-95  Female: 84.3% | Peer support social engagement intervention | Social interaction control group | 20-item Revised-UCLA Loneliness Scale | No significant differences in loneliness between groups (statistics not reported) | Some concerns |
| Kahlon et al., 2023**    Participants recruited through the local programme addressing hunger and isolation for people who are homebound.  USA | 58 adults with symptoms of depression    Mean age: 63 (SD=11)    Females: 80% | Supported socialisation programme: Relational and empathetic phone calls | Control group received assessment calls | 3-item UCLA Loneliness Scale    6-item De Jong Gierveld Loneliness Scale | There was significant group by time interactions for both the UCLA and De Jong Gierveld loneliness scales, indicating greater improvements in loneliness in the intervention than in the control group after 4 weeks (UCLA: time by group interaction: *d* = 0.81, *p* <.001; De Jong: time by group interaction *d* = 0.87, *p* =.02) | High concerns |
| **Perceived social support** | | | | | | |
| **Group based interventions** | | | | | | |
| Conley et al., 2024 **  Participants recruited through campus counselling centre, psychology participant pool, and flyers across campus  Mid-sized, Midwestern University in the USA | 18 adults with mild to moderate depression  Intervention group:  Mean age:  19.90 years  Females: 77.8%  Control group:  Mean age: 19.47 years  Females: 88.9% | Interpersonal psychotherapy | Referral to usual care | The 23-item Social Support Appraisals Scale | There was a significant group by time interaction post-intervention indicating that the intervention group reported greater improvements in social support compared to the control group (*F* (1, 15) = 4.67, *p* = .047, *η*²ₚ = .24) | High concerns |
| Leung & Li, 2024**  Participants were recruited from non-government organisations, local churches, tertiary institutions and district councils  Hong Kong | 57 participants with mild to moderate depressive symptoms  71.9% were aged 46-64  Females: 75.4% | Spiritual connectivity intervention | Wait-list control group | 12-item Multidimensional Scale of Perceived Social Support | No significant group by time differences between the intervention and the control group at 8 weeks (*d* = 0.51) | Some concerns |
| **Individual based interventions** | | | | | | |
| Ayar & Sabanciogullari, 2022 **  Inpatients from public hospital  Turkey | 57 adults diagnosed with depressive disorder  Intervention group:  Mean age: 38.68 years (SD = 9.98)  Females: 57.1%  Control group:  Mean age: 40.34 years (SD = 13.53)  Females: 37.9% | Solution-oriented therapy | Routine inpatient nursing care | 12-item Perceived Social Support Inventory | No statistically significant differences between the intervention and control group at post-treatment, (*t* = − 0.38, *p* = .705) and 3-month follow-up (*t* = − 0.02, *p* = .994) | High concerns |
| **Online/digital interventions** | | | | | | |
| Moeini et al., 2019**  Students recruited from schools  Western Iran | 128 female students with mild-to-moderate depression  Mean age: 16.7 (SD 1.86) | Depression improvement programme based on CBT principles | N/A | Perceived Social Support Scale-Revised | There were significant improvements in social support from baseline to 12 weeks in the intervention group compared to the control group (*p* <.05) | High concerns |
| **Perceived social support and loneliness** | | | | | | |
| **Group-based interventions** | | | | | | |
| a Felton et al., 2020**  Five minimum and medium security prisons  New England, USA | 168 incarcerated individuals with a primary diagnosis of major depressive disorder and reported physical or sexual trauma  Mean age: 39.61 years (SD = 10.45)    Females: 32.7% | Interpersonal psychotherapy (IPT) | Treatment as usual | 12-item Multidimensional Scale of Perceived Social Support  10 item UCLA Loneliness Scale | No significant between group difference in perceived social support (*b* = 2.37, *SE* = 2.50, *p* = .345) or loneliness (*b* = 0.32, *SE* = 0.86, *p* = .708) | Some concerns |
| Johnson et al., 2019**  Medium security prison facilities  Northeastern USA | 181 participants with major depressive disorder  Mean age: 39 (SD = 10.4)  Females: 35% | Group based interpersonal psychotherapy | Treatment as usual | 12-item Multidimensional Scale of Perceived Social Support Scale  20-item UCLA Scale | No significant difference in loneliness (*F* (1,179) = 2.24, *p* = .14, *d* = -0.23) or social support (*F* (1,179) = 2.18, *p* = .14, *d* = 0.13) between the intervention and control group at 3-month follow-up | Some concerns |
| Rodriguez-Romero et al., 2021**  Patients from primary healthcare centres  Barcelona, Spain | 55 lonely patients  61.8% of participants had moderate to severe depression  Mean age: 80.2 (SD= 12.8)  Females: 87.3% | Community based intervention consisting of group-based activities | Treatment as usual | UCLA Loneliness Scale  DUKE-11  Functional Social Support Questionnaire | The mean improvement in loneliness was 8.63 (95% CI [1.97,15.30], *p* =.01) points higher in the intervention group compared to the control group post-treatment (6 months)  No significant improvement in social support between the intervention and control group | High concerns |

*Subjective social isolation as the primary outcome

**Subjective social isolation as one of the main outcomes

N/A: Not available

a Felton et al (2019) conducted a secondary analysis of data from a larger RCT included in this review (Johnson et al., 2019)

Table 2. Summary of characteristics of trials assessing loneliness or/and perceived social support as an outcome of interest among people with postnatal depression (*n*=6)

| Author    Study setting    Type of sample | Sample characteristics | Intervention  type | Comparator group | Loneliness/  perceived social support measure | Summary of findings: Effectiveness of the intervention | Quality ratings |
| --- | --- | --- | --- | --- | --- | --- |
| **Loneliness** | | | | | |  |
| **Online/Digital interventions** | | | | | |  |
| Perkins, Spiro & Waddel, 2023*  Community based sample recruited through community channels  United Kingdom | 89 women with post-natal depression    Mean age: 35.39 (SD= 3.74) | Supportive socialisation online song-writing intervention | Wait-list control group | 3-item UCLA Loneliness Scale | The intervention group reported significantly lower loneliness than the control group across all time-points (6 weeks and 4-week follow-up) (*F* (1,60) = 4.42, *p* < .05, *η*²ₚ = .069), and over time (*F* (5.554, 333.248) = 6.50, *p* < .001, *η*²ₚ = .098) | High concerns |
| **Perceived social support** | | | | | |  |
| **Group based interventions** | | | | | |  |
| Boyd et al., 2017 **  Participants recruited from primary care sites, and a community service helping people who are economically disadvantaged    USA | 61 depressed caregivers of toddlers  Intervention group:  Mean age: N/A  Females: 96.9%  Control group:  Mean age: N/A  Females: 100% | Parenting program plus psychoeducation | Wait-list control | 12-item Multidimensional Scale of Perceived Social Support | No significant differences in perceived social support between groups at 12 weeks | High concerns |
| **Online/Digital interventions** | | | | | | |
| Dol et al., 2025 **  Participants recruited through social media adverts and study posters at local hospitals and clinics  Nova Scotia, Canada | 150  mothers with post-partum depression  Intervention group:  Mean age: 30.7 years (SD = 4.8)  Control group:  Mean age: 32.1 (SD = 4.1) | Daily SMS text messaging program providing information on maternal mental health | Treatment as usual (no text messages) | 12-item Multidimensional Scale of Perceived Social Support | No significant differences between the intervention and control group in perceived social support scores at 6 months follow-up (*F* (1,130) =0.071, *p* =.79, *η*2=0.001) | High concerns |
| Liu et al., 2022**  Women recruited from a hospital  China | 130 women diagnosed with post-partum depression  Mean age: 31.81 (SD = 5.36) | Mobile health app intervention based on mindfulness and perceived social support theory | Wait-list control group | 12-item Multidimensional Perceived Social Support Scale | No differences between groups post-treatment (8 weeks) (*F* (1,128) = 3.074, *p* = .08)  There was a significant group by time interaction indicating that the intervention group had significant improvements in social support over time compared to the control group (*F* (1,128) = 7.749, *p* = .006, *η*²ₚ = 0.057) | Some concerns |
| Seo et al., 2022**  Participants were recruited through internet communities  South Korea | 73 women who met criteria for postpartum depression  Intervention group:  Mean age: 33.54 (SD = 3.30)  Control group:  Mean age: 33.36 (SD = 4.47) | Cognitive behavioural therapy based self-management mobile application | Control group: Educational leaflet on postpartum depression | 12-item Multidimensional Scale of Perceived Social Support | No differences between the intervention and control group post intervention or at 3-month follow-up (*F*= (1, 71) = 0.58, *p* =.45) or across time (*F* (2,142) = 0.14, *p* =.87) | High concerns |
| **Perceived social support and loneliness** | | | | | | |
| **Online/Digital interventions** | | | | | | |
| Shorey et al., 2019**    Tertiary hospital  Singapore | 138 postnatal mothers at-risk of postpartum depression  Mean age = 32.05 (SD = 4.35) | Supported socialisation and peer support via technology-based peer-support intervention program | Standard postnatal care provided by hospital | 10 item UCLA Loneliness Scale    8 item Perceived Social Support for Parenting scale | No significant differences in loneliness between the groups at 1 month (*d* = -2.45, 95% CI [-7.0, 2.1], *p* = .29) and at 3 months (*d=* -3.43, 95% CI [-8.0, 1.1], *p*=.14) and over time (*d =* -2.16; 95%CI [-4.4, 0.0], *p* = .06)    No significant differences in social support between the groups at 1 month (*d* = 0.86; 95% CI [-3.9, 2.1], *p* =.57) and 3 months (*d* = -0.53; 95% CI [-4.7, 3.6], *p* =.80) and over time (*d =* 0.86; 95% CI [-0.9, 2.6], *p* =.33) | High concerns |

*Subjective social isolation as the primary outcome

**Subjective social isolation as one of the main outcomes

N/A: Not available

Table 3. Summary of characteristics of trials assessing loneliness or/and perceived social support as an outcome of interest among people with common mental health conditions (mixed sample groups of people with depression and anxiety) (n=5)

| Author    Study setting    Type of sample | Sample characteristics | Intervention  type | Comparator group | Loneliness/  perceived social support measure | Summary of findings: Effectiveness of the intervention | Quality ratings |
| --- | --- | --- | --- | --- | --- | --- |
| **Loneliness** | | | | | |  |
| **Group-based interventions** | | | | | |  |
| Smith et al., 2021*  University health clinic, and advertisements in community settings  Sydney, Australia | Sample of 62 older adults with symptoms of both DSM-IV anxiety and unipolar mood disorder  Mean age: 67.44 (SD= 6.19)  Females: 64.52% | Group-based cognitive behavioural therapy | Wait-list control group | Single item (“I felt lonely”) from Center for Epidemiologic Studies Depression Scale | The group by time interaction showed significant improvement in loneliness among the intervention group compared to the waitlist group over time (*F* (1,40.609) = 7.070, *p* = .011, *d* = -0.65) | High concerns |
| Syed, 2017*  Residential aged care facilities  Malaysia | 34 participants aged 60 or older who are lonely and/or have anxiety and depression  Intervention:  Mean age: 67 (SD = 4.67)  Females: 50%  Control:  Mean age: 69 (SD = 6.60)  Females: 56% | Spiritual reminiscence therapy | Attention control group | 20-item UCLA Loneliness Scale | No significant differences in loneliness between the intervention and control group (Main effect of group: *F* (1,32) = 0.03, *p* = .87); group by time interaction: *F* (2,31) = 0.01, *p* = .99) | High concerns |
| **Online/Digital interventions** | | | | | | |
| Karkosz et al., 2024*  Participants recruited through social media  Poland | 81 participants with at least mild symptoms of depression or anxiety  Intervention group:  Mean age: 24.76 (SD = 4.01)  Females: 73%  Control group:  Mean age: 46.60 (SD= 5.06)  Females: 71% | Agent-guided cognitive behavioural therapy | Self-help book and psychoeducation | 20-item Revised UCLA Loneliness Scale | No significant differences in loneliness between the intervention and control group (Main effect: *F* (1,66) = 0.689, *p* =.409; group by time: *F* (1,66) =1.130, *p* =.257) | High concerns |
| **Mixed interventions (individual and group based)** | | | | | | |
| Zhang et al., 2024**  Participants recruited from three randomly selected communities  Tianshui, China | 133 community-dwelling elderly aged 60 or above with symptoms of anxiety or depression  Females: 80 (60%)  Mean age: 67.99 (SD 6.40) | Individual counselling and psychoeducation (e.g. coping skills, cognitive restructuring techniques) | Mental health education and educational pamphlet | 20-item UCLA Loneliness Scale | The intervention group reported a greater reduction in loneliness compared to the control group at one year follow-up (*F*=5.781, *p* =.009)  No significant group by time interactions (*F*=1.052, *p* = .247) | High concerns |
| **Perceived social support** | | | | | | |
| **Group based interventions** | | | | | | |
| Ruiz-Comellas et al., 2022**  Participants recruited from electronic medical records  Spain | 90 participants over the age of 64 diagnosed with depression or anxiety  Intervention group:  Mean age: 75 (SD=6.02)  Females: 71.43%  Control group:  Mean age: 74 (SD=5.18)  Females: 81.81% | Group based moderate intensity physical activity programme | Treatment as usual at primary care centres | DUKE-11 Functional social Support Questionnaire | There were significant between group differences and improvements in social support in the intervention group compared to the control group (*p* =.01) | High concerns |

*Subjective social isolation as the primary outcome

**Subjective social isolation as one of the main outcomes

N/A: Not available

Table 4. Summary of characteristics of trials assessing loneliness or/and perceived social support as an outcome of interest among people with social anxiety disorder (n=2)

| Author    Study setting    Type of sample | Sample characteristics | Intervention  type | Comparator group | Loneliness/  perceived social support measure | Summary of findings: Effectiveness of the intervention | Quality ratings |
| --- | --- | --- | --- | --- | --- | --- |
| **Loneliness** | | | | | |  |
| **Group-based interventions** | | | | | |  |
| O’Day et al., 2021**  Participants recruited through clinical referrals and advertisements in community settings  United States | Clinical sample of 108 individuals with social anxiety disorder  Mean age: 32.7, (SD = 8.0)  Females: 55.6% | Two active interventions:  Cognitive-behavioural group therapy (CBGT)  Mindfulness-based stress reduction (MBSR) | Wait-list control group | 8-item UCLA Loneliness Scale | Loneliness was significantly lower for CBGT group compared to the waitlist group (*t* (102.48) = 2.96, *p* = .004, *d =* 0.29) and for MBSR group compared to the waitlist group (*t* (103.82) = 3.57, *p* = .001, *d =* 0.34)  There was a significant group by time interaction (*F* (2,104.02) = 7.36, *p =* .001, *η*p2 = .12)  There was no significant difference in loneliness between CBGT and MBSR  (*t* (105.86) = 0.53, *p* = .60, *d* = 0.05) | High concerns |
| **Online/Digital interventions** | | | | | | |
| Mueller & Cougle, 2023*  Participants recruited from the community and undergraduate psychology students research pool  United States | 55 participants with social anxiety disorder  Intervention group:  Mean age: 19 (SD= 1.39)  Female: 77.8%  Control group:  Mean age: 19.92 (SD= 2.84)  Female: 92.6% | Multi-component intervention targeting fear of intimacy | Wait-list control condition | 20-item UCLA Loneliness Scale | No significant effect of group on loneliness at post-treatment (β = 0.04, *p* = .62, *sr²* = 0.002) or at 1 month follow-up (β *=* 0.15*, p* = .08, *sr*²=0.01) | High concerns |

*Subjective social isolation as the primary outcome

**Subjective social isolation as one of the main outcomes

N/A: Not available

Table 5. Summary of characteristics of trials assessing loneliness or/and perceived social support as an outcome of interest among people with psychosis (n=4)

| Author    Study setting    Type of sample | Sample characteristics | Intervention  type and control group | Comparator group | Loneliness/  perceived social support measure | Summary of findings: Effectiveness of the intervention | Quality ratings |
| --- | --- | --- | --- | --- | --- | --- |
| **Loneliness** | | | | | |  |
| **Group-based interventions** | | | | | |  |
| Hogg et al., 2025*  Mental health services (e.g. early intervention services) and charities  United Kingdom | 40 adults diagnosed with psychosis  Individual-format intervention:  Mean age: 38.75 (SD= 12.10)  Females: 55%    Group-format intervention:  Mean age: 43.65 (SD= 12.52)  Females: 60% | Groups for Health (G4H) intervention adapted for individuals with psychosis | Conventional individual format G4H intervention | Short 8-item UCLA Loneliness Scale | There were no significant between-format differences for  loneliness | High concerns |
| **Individual based interventions** | | | | | | |
| Öztürk et al., 2025 **  Community mental health centre  Turkey | 61 individuals diagnosed with schizophrenia  Intervention group:  Mean age: 39.6 (SD= 9.61)  Females: 46.7%  Control group:  Mean age: 41.55 (SD=9.82)  Female: 45.2% | Equine-assisted therapy | Treatment as usual (activities offered in the community mental health service) | 20-item UCLA Loneliness Scale | The equine assisted intervention group reported significantly lower loneliness scores compared to the control group (*d* = 0.99, 95% CI [-1.53, -0.44], *p* < .001). | High concerns |
| **Perceived social support and loneliness** | | | | | | |
| **Online/Digital interventions** | | | | | | |
| Alvarez-Jimenez et al., 2021**  Early psychosis intervention and prevention service  Melbourne, Australia | 170 first episode psychosis patient  Mean age: 20.91 (SD=2.88)  Aged 16-27  Females: 47.1% | “Horyzons” Supported socialisation: peer support and online therapy programme | Treatment as usual (primary and tertiary mental health services) | 20-item UCLA Loneliness Scale  19-item Medical Outcomes Study Social Support Survey | No significant differences in loneliness (β = 0.06, *p*=.54) or social support (β = -0.003, *p*=.82) between the intervention and control group | Some concerns |
| **Mixed intervention (individual and group based)** | | | | | | |
| Vogel et al., 2023**  Participants recruited from Flexible Assertive Community teams  Netherland | 43 participants diagnosed with schizophrenia  Intervention group:  Median age: 42.0 (IQR= 18.0)  Females: 29.6%  Control group:  Median age: 42.5 (IQR= 6.6)  Female: 31.2% | HospitalitY Eating club: Nurse guided peer support groups and home based skills training sessions | Waitlist control group | De Jong Geirveld Loneliness scale  DUKE-11 Functional Social Support Questionnaire | No statistically significant differences between groups on perceived social support (end of treatment (8 months): *p* = .90; follow-up (12 months): *p* = .31) or loneliness (end of treatment: *p* = .59; follow-up: *p*= .98) | High concerns |

*Subjective social isolation as the primary outcome

**Subjective social isolation as one of the main outcomes

N/A: Not available

Table 6. Summary of characteristics of trials assessing loneliness or/and perceived social support as an outcome of interest among people with PTSD (n=4)

| Author    Study setting    Type of sample | Sample characteristics | Intervention  type and control group | Comparator group | Loneliness/  perceived social support measure | Summary of findings: Effectiveness of the intervention | Quality ratings |
| --- | --- | --- | --- | --- | --- | --- |
| **Perceived social support** | | | | | |  |
| **Group based interventions** | | | | | | |
| Amin et al., 2020 **  Five public schools in flood affected areas  Pakistan | 75 elementary school students with post-traumatic stress disorder  Mean age: 11.43 (SD=1.44)  Females: 34.7% | School-based cognitive behavioural therapy | Routine activities (e.g. playing outside) | 60-item Child and Adolescent Social Support Scale | There is a significant between group differences (*F* (1,73) = 6.09, *p* < .05, *η*2=.08) and group by time interaction (*F* (1, 73) = 50.74, *p* < .001, *η*2 = .41) indicating that the intervention group reported greater social support compared to the control group at end of treatment | Some concerns |
| **Individual based interventions** | | | | | | |
| Birkeland et al., 2020**  Children and youth recruited from the Norwegian centre for violence and traumatic stress  Norway | 156 children and youth who have been exposed to trauma  Mean age: 15.1 years (age range:10-18)  Females: 79.5% | Trauma focused cognitive behavioural therapy | Treatment as usual | DUKE-11 Functional Social Support Questionnaire | No differences in perceived social support between groups (β = −0.18, *p* = .146) | High concerns |
| Bourassa et al., 2020 **  Participants recruited from a large military installation    USA | 162 active-duty army soldiers with posttraumatic stress disorder  Prolonged exposure:  Mean age: 30.9 years (SD = 7.1)  Females: 5.6%  Prolonged exposure Plus virtual reality:  Mean age: 29.5 years (SD = 6.5)  Females: 3.7% | Prolonged exposure therapy (either with or without virtual reality) | Minimal attention waitlist control | The Revised Behavior and Symptom Identification Scale: Social Support subscale | The exposure intervention groups experienced greater improvement in social support from baseline to mid-treatment (β = 0.29, 95% CI [0.12, 0.46], *p* = .029), and at post-treatment (β = 0.43, 95% CI [0.13, 0.73], *p* = .004), compared to the waitlist control group | High concerns |
| Campbell et al., 2019**  Two PTSD specialty clinics  Pacific Northwest of the USA | 80 veterans with a current PTSD diagnosis  Mean age:  30 years (SD = 6.66)  Females: 5 (6.3%) | Behavioural activation psychotherapy (BA) | Treatment as usual (alternative psychotherapies or pharmacotherapy) | Sarason Social Support Questionnaire – Short Form: Satisfaction with support questions (SSQS) | No improvements in social support in the BA group compared to the control group (test statistics not reported) | High concerns |

*Subjective social isolation as the primary outcome

**Subjective social isolation as one of the main outcomes

N/A: Not available

Table 7. Summary of characteristics of trials assessing loneliness or/and perceived social support as an outcome of interest in samples with mixed mental health conditions (n=8)

| Author    Study setting    Type of sample | Sample characteristics | Intervention  type and control group | Comparator group | Loneliness/  perceived social support measure | Summary of findings: Effectiveness of the intervention | Quality ratings |
| --- | --- | --- | --- | --- | --- | --- |
| **Loneliness** | | | | | |  |
| **Group based interventions** | | | | | | |
| Cruwys et al., 2021*  Two community and university based mental health services  Australia | 174 young people seeking mental healthcare for any mental health condition  Mean age: 18.94 years (SD = 1.96)  Females: 75% | Groups 4 Health (G4H) | Dose-controlled manualised group-based CBT for depression | 4-item UCLA Loneliness Scale | The G4H group showed greater improvement in loneliness compared to the CBT condition (*t* (1090) = 2.12, *p* = .034)    The between-group difference at 12 months did not reach statistical significance (*p* = .075) | Some concerns |
| Haslam et al., 2019*  Community and university health services  Australia | 120 adults diagnosed with a mental health condition  Mean age: 31.06 years (SD=12.80)  Females: 64% | Groups 4 Health (G4H) | Treatment as usual | 8-item UCLA Loneliness Scale | No significant between group differences (β *=* 0.140, SE=.189, *p* = .459). The G4H intervention group showed a significantly greater reduction in loneliness compared to the control group overtime (Time by Condition: β = –0.743, SE = .218, *p* < .001) | High concerns |
| **Individual based intervention** | | | | | | |
| Radin et al., 2023*  A private non-profit health system  St Luke Health system in Idaho USA | 331 patients and 335 staff/providers with moderate-high loneliness, depression suicidal ideation, psychological stress or/and anxiety  Mean age: 43.1 (SD=14.4)  Females: 82.7% | Two active interventions:  Caring contacts (CC): brief non-demanding and caring text messages  Caring contacts+ (CC+): brief non-demanding and caring text messages and introductory phone call | N/A | NIH Toolbox Social Relationship Scales Emotion Battery Loneliness measure | There were no observed significant differences in loneliness between the CC and CC+ groups | Some concerns |
| Short et al., 2019  Veteran from community outpatient services  USA | 46 veterans with mood disorders, PTSD, and substance misuse. 98% experience active suicidal ideation  Mean age: 48.4 (SD = 13.70) Female: 13.2% | Psychoeducation combined with cognitive bias modification | Repeated contact control | Interpersonal Needs Questionnaire: Thwarted Belonginess subscale | The intervention group reported significantly lower thwarted belongingness compared to the control group at follow-up (*B=* - 9.93, *SE=*4.59, *p=*.036) | High concerns |
| **Mixed interventions (Individual and group based)** | | | | | | |
| Lloyd-Evans et al., 2020*  Two secondary mental health services in London  United Kingdom | 40 participants who met minimum threshold for loneliness and have a diagnosis of depression or anxiety or post-traumatic stress disorder or non-psychotic disorders  Mean age: 43.1 (SD=13.1)  Females: 73% | Individual and group-based peer delivered socially focused programme | Treatment as usual | 11-item De Jong Giervald Scale | The median for loneliness in the intervention group reduced from 11 at baseline to 9 at follow-up  The median for loneliness in the intervention group reduced from 10.5 at baseline to 10 at follow-up | High concerns |
| Russinova et al., 2023**  University based recovery-oriented services and outpatient services in Boston, Denver, Bridgeport, and Wakefield  USA | 185 participants diagnosed with schizophrenia, bipolar disorder, depression, post-traumatic stress disorder, and other undefined conditions  Intervention group:  Mean age: 47.39 (SD= 11.99)  Females: 60.6%  Control group:  Mean age: 47.79 (SD= 11.62)  Females: 61.5% | Community participation intervention:  Peer-delivered individual and group sessions | Treatment as usual | 20-item UCLA Loneliness Scale | No group differences between the intervention and control group (F (1,160) = 0.00, p = .958) or group by time interaction in loneliness (F (1,160) = 0.07, p = .792, *d*= - 0.08) | High concerns |
| **Perceived social support** | | | | | | |
| **Individual based interventions** | | | | | | |
| Laurila et al., 2024**    Psychiatric outpatient departments  Helsinki, Finland | 326 adults aged 20-45 diagnosed with a mood or anxiety disorder based on the DSM-IV criteria    Mean age: 32.3 (SD= 6.9)  Females: 76.1% | Three active interventions:  Solution-focused psychotherapy (SFT)  Short term psychodynamic psychotherapy (SPP)  Longterm psychodynamic psychotherapy (LLP) | N/A | 13-item Brief Inventory of Social Support and Integration Scale | No statistically significant differences in social support across the three intervention groups over the period of 5 years | High concerns |
| **Perceived social support and loneliness** | | | | | | |
| **Individual based interventions** | | | | | | |
| Swinkels et al., 2023 **  Forensic psychiatric outpatient care department  Amsterdam | 102 forensic psychiatric outpatients diagnosed with any psychiatric diagnosis  Mean age:  40.5 years (SD= 12.80)    Females: 11.8% | Supported socialisation intervention | Standard forensic psychiatric outpatient treatment | 34-item Social Support List Interactions  11-item De Jong Gierveld Scale | No significant differences in social support between groups over time (adjusted effect = 0.130, 95% CI [-0.042 to 0.302], not significant)  No significant differences in loneliness between groups over time (adjusted effect = -0.078, 95% CI [-0.349 to 0.192], not significant) | High concerns |

*Subjective social isolation as the primary outcome

**Subjective social isolation as one of the main outcomes

N/A: Not available
