# Supplementary material
Source: Research Square preprint supplement (doi:10.21203/rs.3.rs-9576879/v1)
Supplement: Supplementary file 5 [file e8be7aa7ca6363fb2e941942.docx]

**Appendix 2: Search terms**

| **#** | **Search term** |
| --- | --- |
| 1 | Loneliness.mp. |
| 2 | Loneliness.mp. or Loneliness (MeSH) |
| 3 | lonely.mp. |
| 4 | (social support adj5 (subjective or personal or perceived or quality)).mp. |
| 5 | Confiding relationship*.mp. |
| 6 | 1 or 2 or 3 or 4 or 5 |
| 7 | Mental Disorders (MeSH) |
| 8 | Alcoholism/or Middle Aged/or Child Behaviour Disorders/or Child/or Adolescent/or Stress Disorders, Post-Traumatic/or Adult/or Depression/or Mental Disorders/or mental health problems.mp. or Substance-Related Disorders/ |
| 9 | Bipolar Disorder/or Psychotic Disorders/or Aged/or Stress, Psychological/or Middle Aged/or Community Mental Health Services/or Adult/or Mental Disorders/or mental illnesses.mp. or Schizophrenia/ |
| 10 | mental.mp. |
| 11 | Psychiatr*.mp. |
| 12 | Schizo*.mp. |
| 13 | Psychosis.mp. |
| 14 | Depress*.mp. |
| 15 | Suicid*.mp. |
| 16 | Mania*.mp. |
| 17 | Manic.mp. |
| 18 | Bipolar.mp. |
| 19 | Anxiety.mp. |
| 20 | Personality disorder*.mp. |
| 21 | Eating disorder*.mp. |
| 22 | Anorexia.mp. |
| 23 | Bulimia.mp. |
| 24 | PTSD.mp. |
| 25 | Post-traumatic stress disorder*.mp. |
| 26 | 7 or 8 or 9 or 10 or 11 or 12 or 13 or 14 or 15 or 16 or 17 or 18 or 19 or 20 or 21 or 22 or 23 or 24 or 25 |
| 27 | 6 and 26 |
| 28 | Clinical trial.mp. |
| 29 | Controlled study.mp. |
| 30 | Randomized controlled trial.mp. |
| 31 | Randomised controlled trial.mp. |
| 32 | RCT.mp. |
| 33 | 28 or 29 or 30 or 31 or 32 |
| 34 | 27 and 33 |
